# Supplementary material for: Alkynylselenolatoalkylidynes (LnMC–Se–CCR) as building blocks for mixed metal/main-group extended frameworks
Source: Royal Society of Chemistry journal article supplement (doi:10.1039/c9dt01504c), 2019-01-01
Supplement: c9dt01504c1.pdf [file c9dt01504c1.pdf]

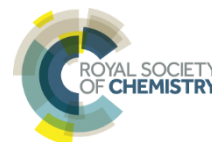

**Electronic Supporting information for:**

**Alkynylselenolatoalkylidynes ( $L_nM\equiv C-Se-C\equiv CR$ ) as building blocks for mixed metal/main-group extended frameworks**

Benjamin J. Frogley,<sup>a</sup> Tobias L. Genet,<sup>a</sup> Anthony F. Hill<sup>\*a</sup> and Chee S. Onn<sup>a</sup>

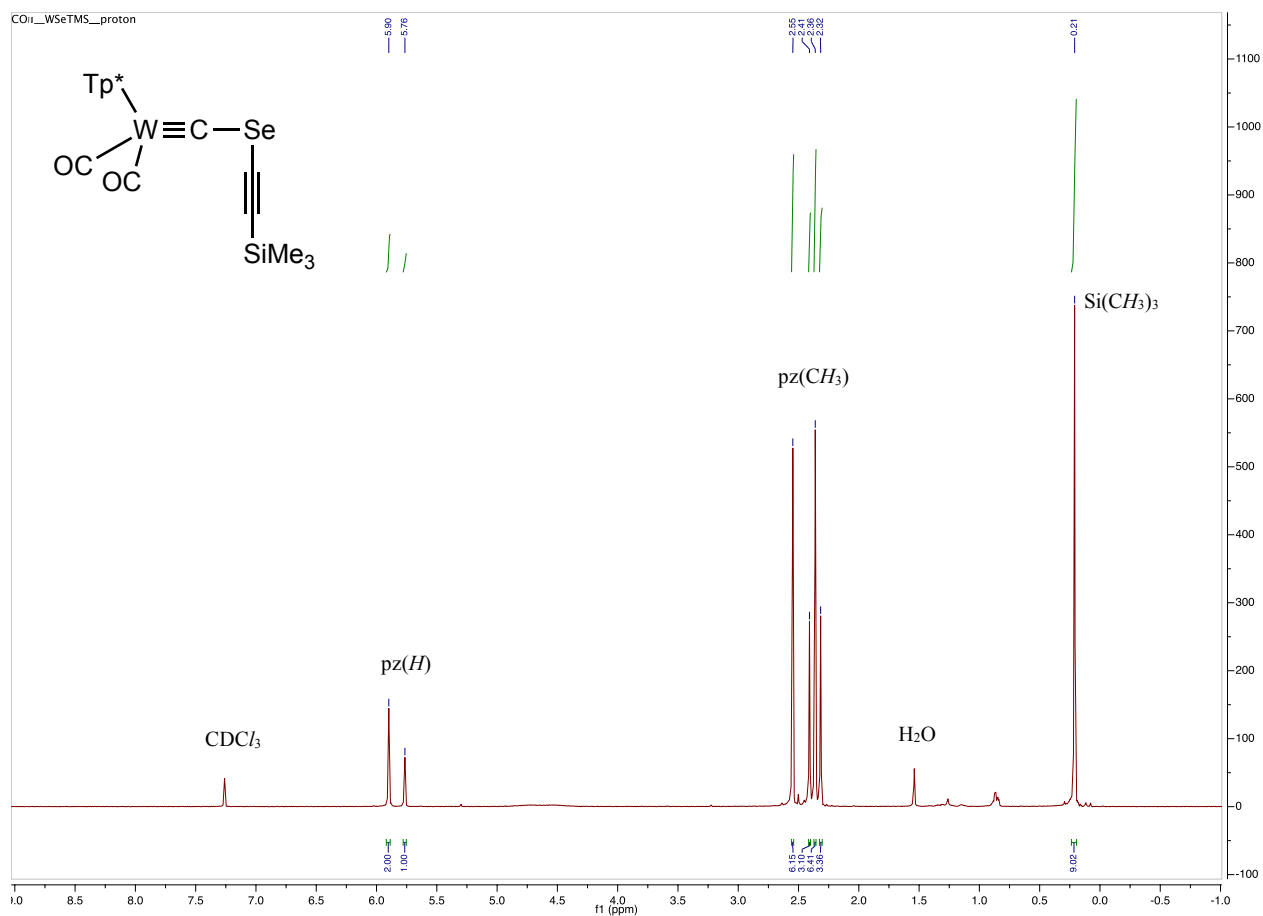

$^1\text{H}$  NMR (700 MHz,  $\text{CDCl}_3$ ,  $25^\circ\text{C}$ ,  $\delta$ ) of  $[\text{W}(\equiv\text{CSeC}\equiv\text{CSiMe}_3)(\text{CO})_2(\text{Tp}^*)]$  (2).

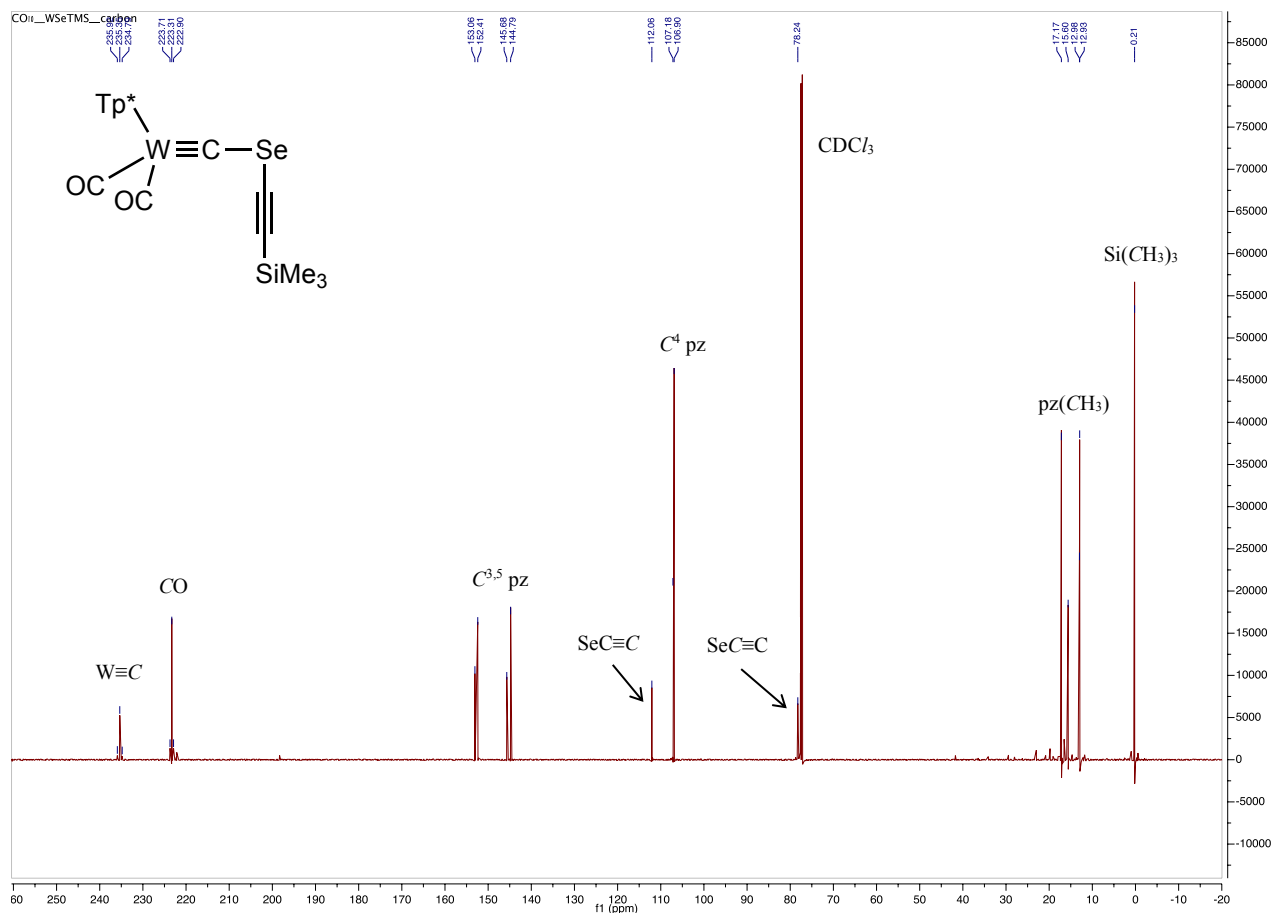

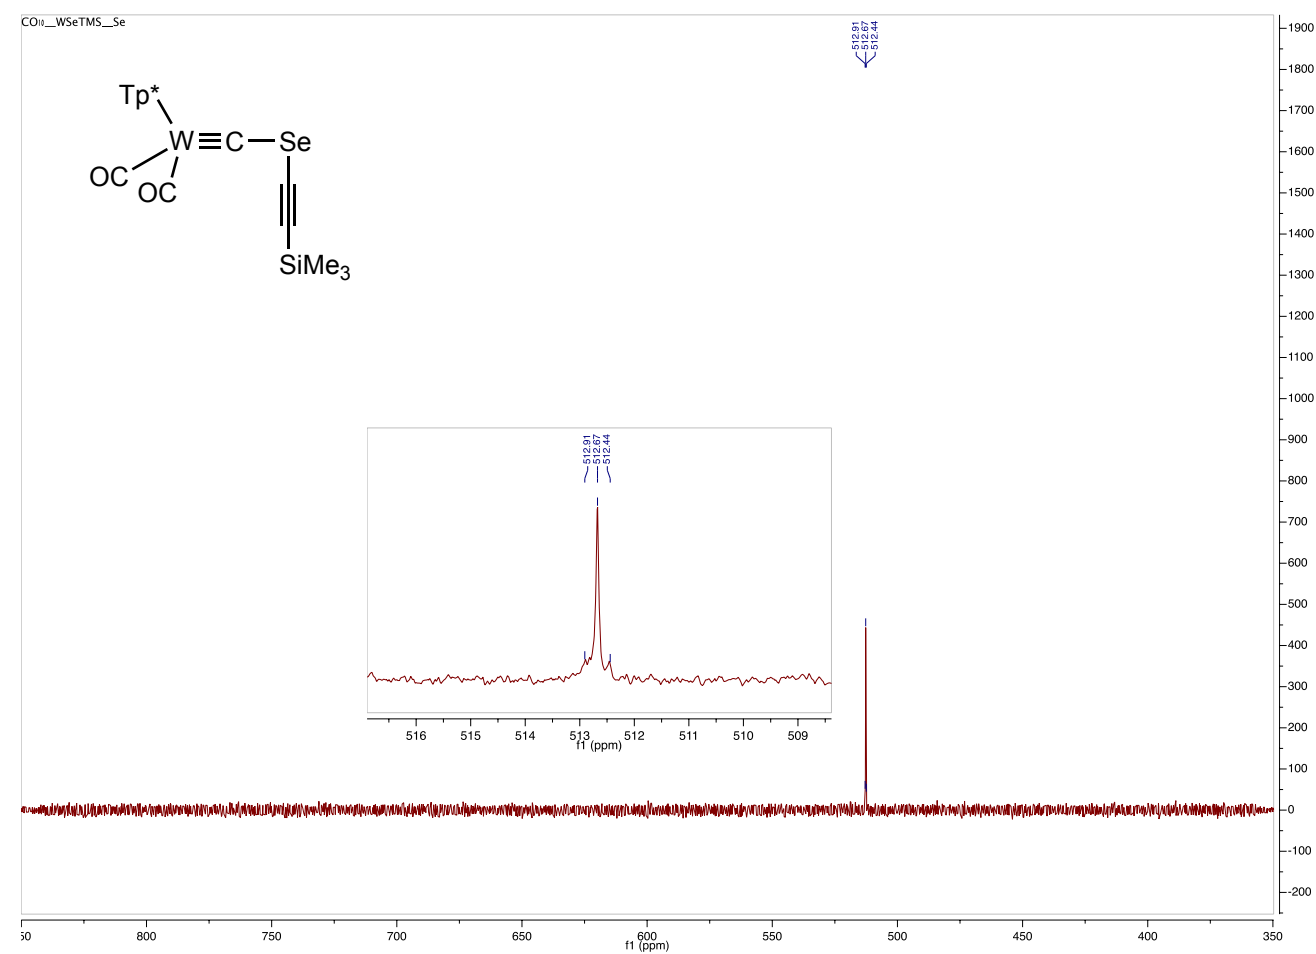

$^{77}\text{Se}\{^1\text{H}\}$  NMR (76 MHz,  $\text{CDCl}_3$ ,  $25^\circ\text{C}$ ,  $\delta$ ) of  $[\text{W}(\equiv\text{CSeC}\equiv\text{CSiMe}_3)(\text{CO})_2(\text{Tp}^*)]$  (**2**).

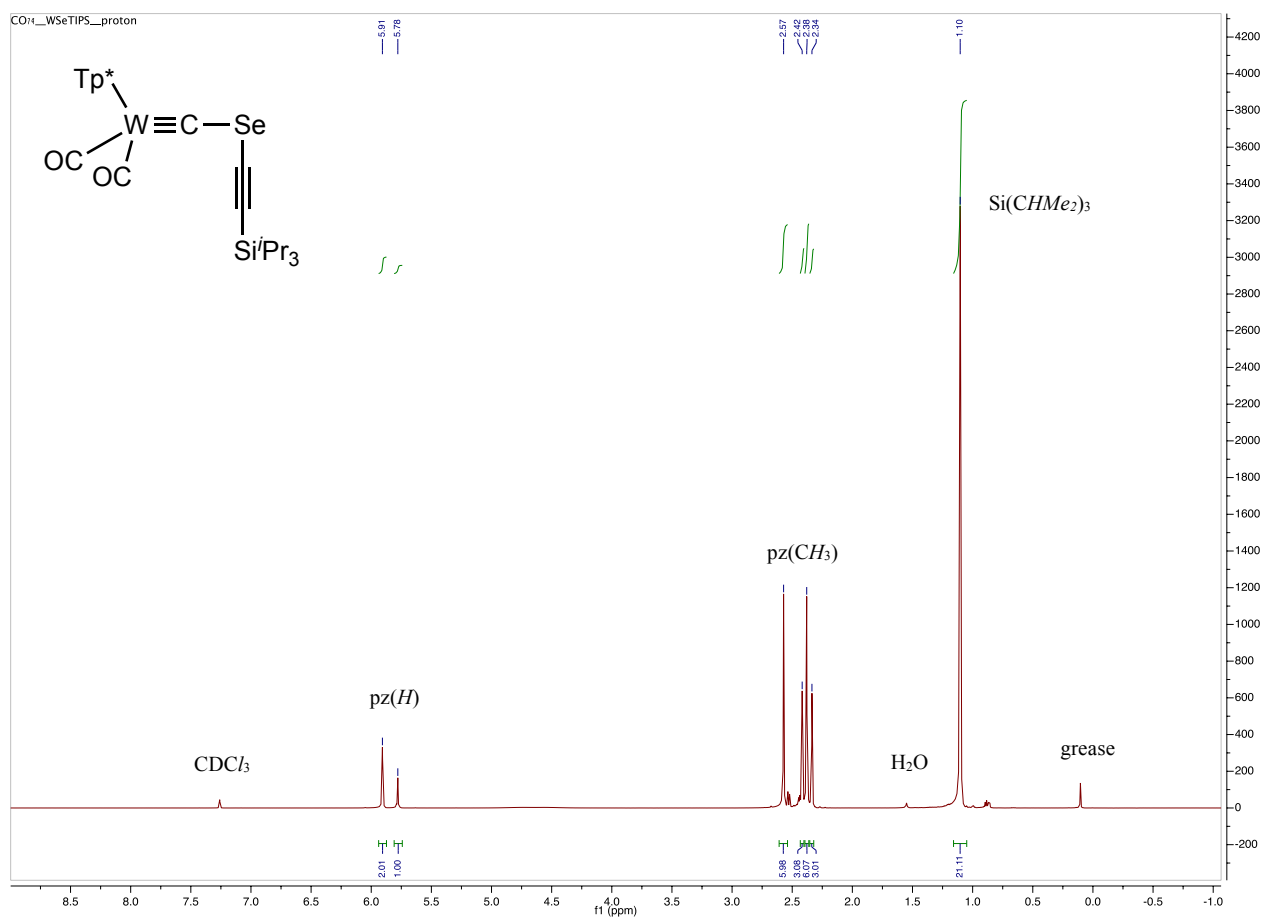

$^1\text{H}$  NMR ( $600\text{ MHz}$ ,  $\text{CDCl}_3$ ,  $25^\circ\text{C}$ ,  $\delta$ ) of  $[\text{W}(=\text{CSeC}\equiv\text{CSi}^i\text{Pr}_3)(\text{CO})_2(\text{Tp}^*)]$  (**3**).

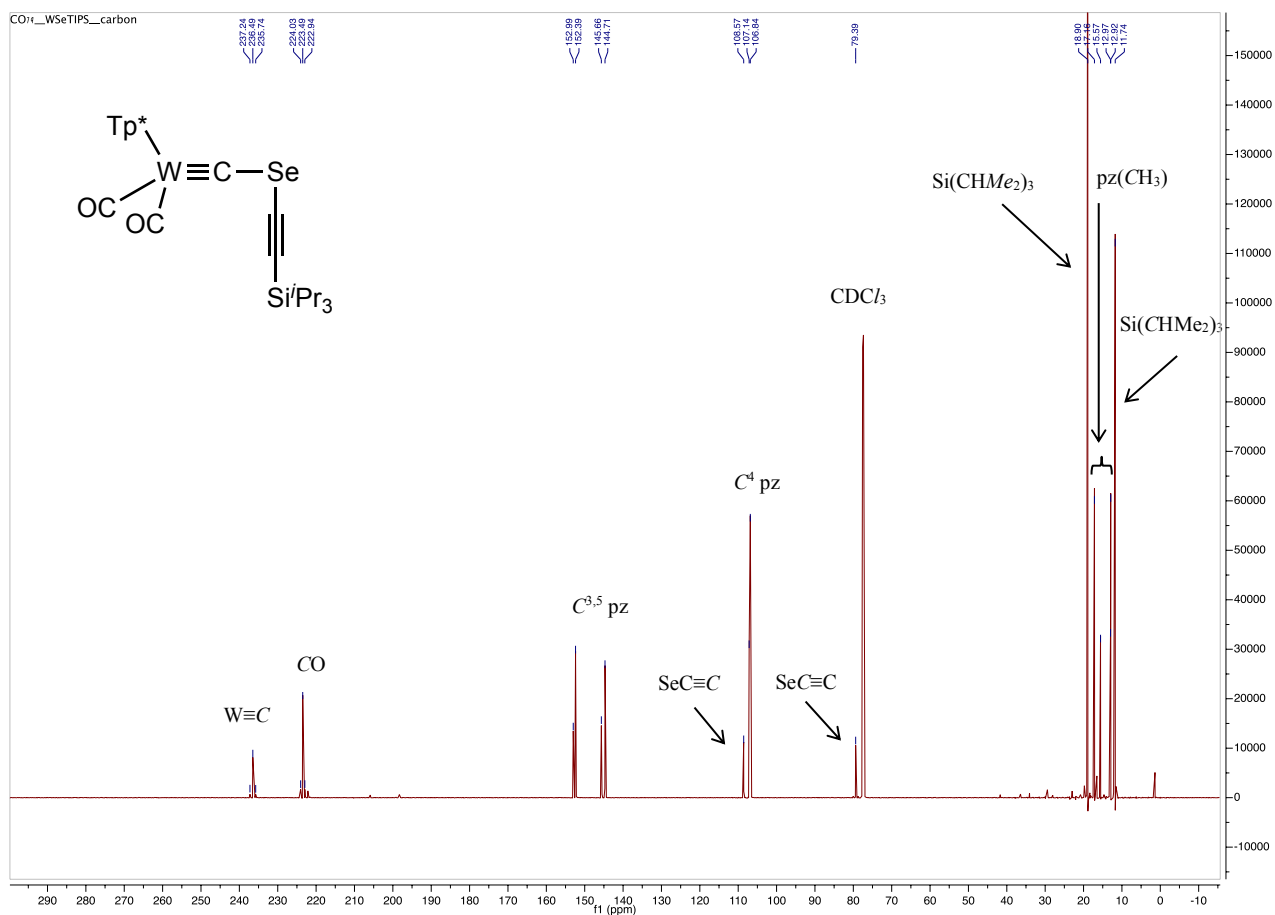

$^{13}C\{^1H\}$  NMR (151 MHz, CDCl<sub>3</sub>, 25 °C, δ) of  $[W(=CSeC\equiv CSiPr_3)(CO)_2(Tp^*)]$  (**3**).

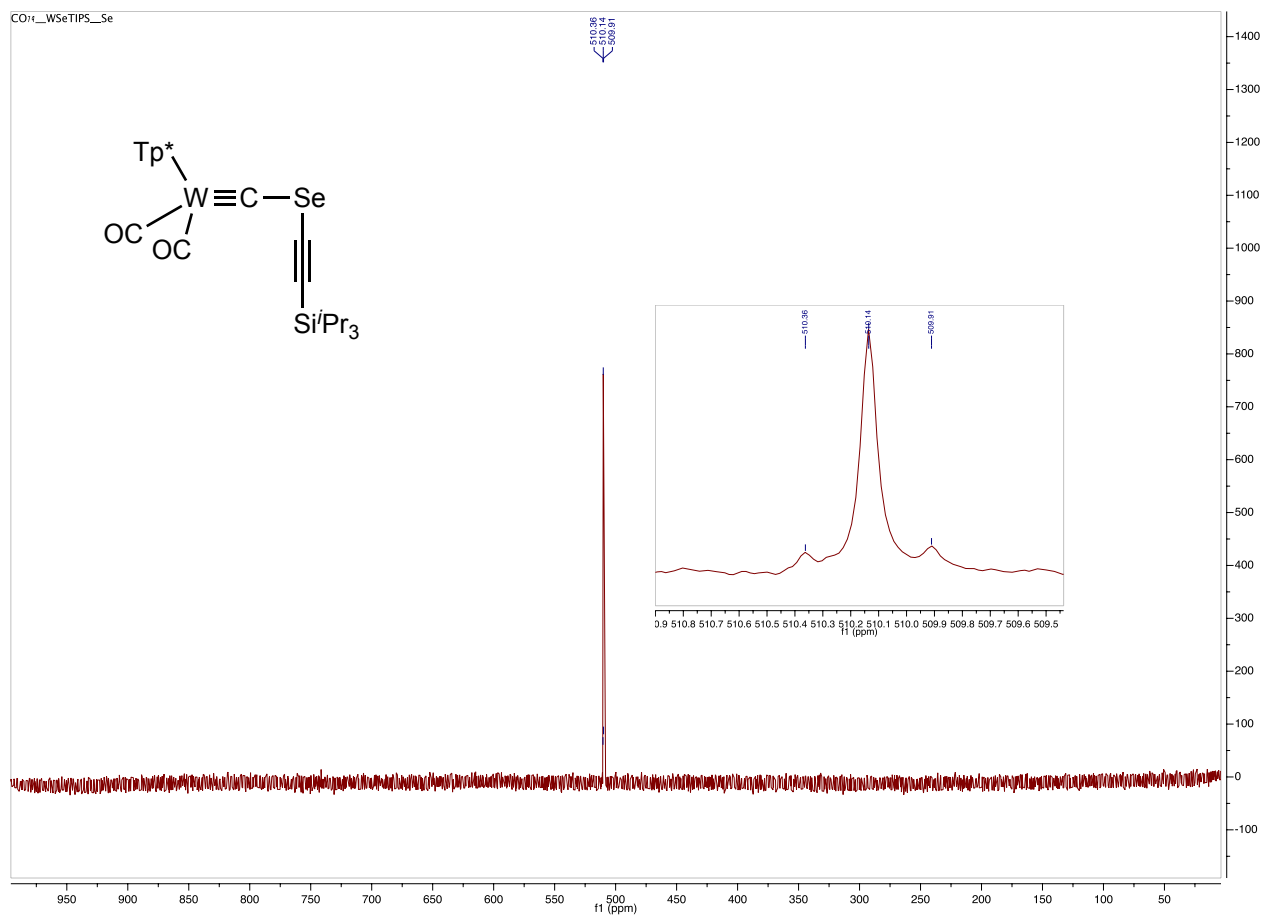

$^{77}\text{Se}\{^1\text{H}\}$  NMR (76 MHz,  $\text{CDCl}_3$ ,  $25^\circ\text{C}$ ,  $\delta$ ) of  $[\text{W}(\equiv\text{CSeC}\equiv\text{CSi}^i\text{Pr}_3)(\text{CO})_2(\text{Tp}^*)]$  (3).





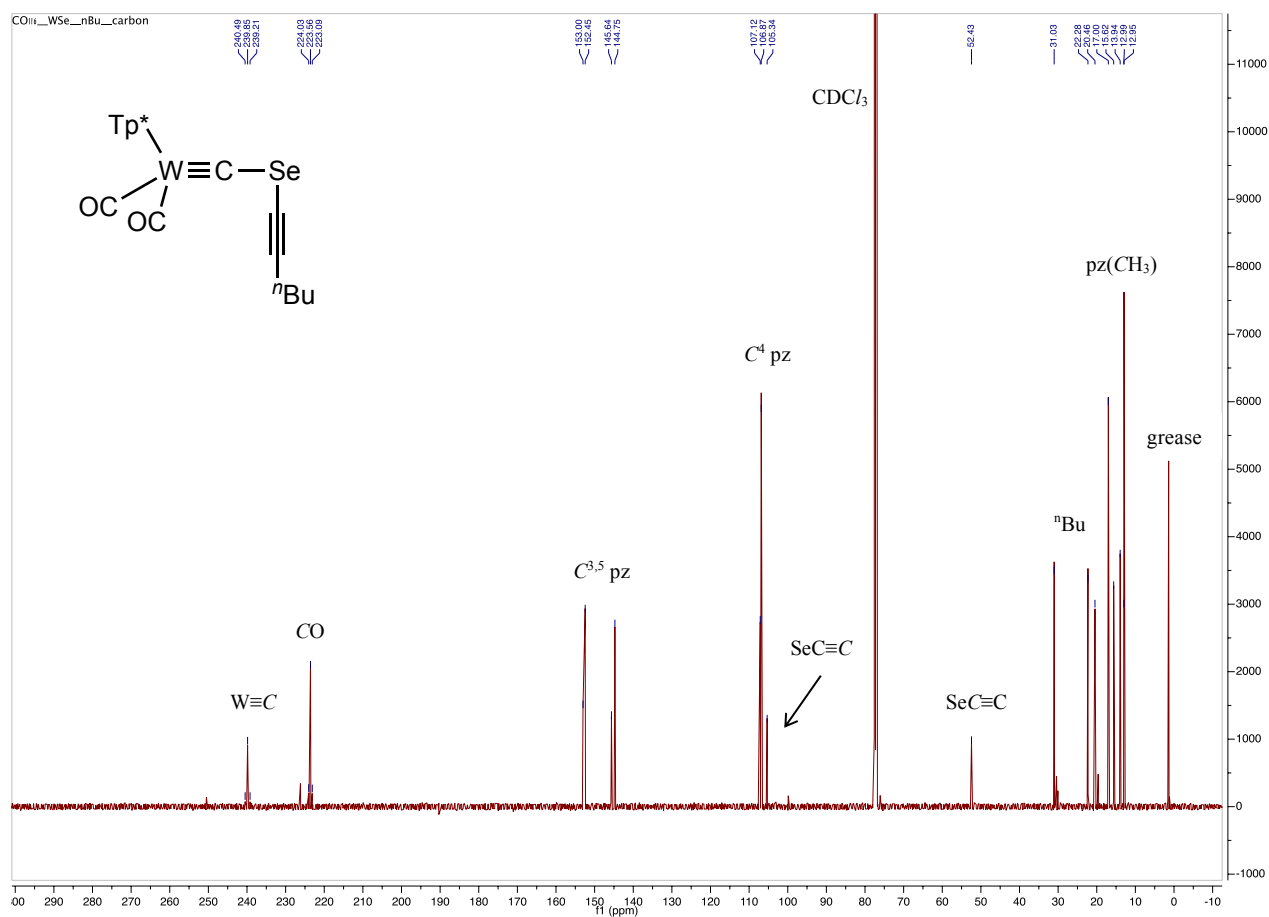

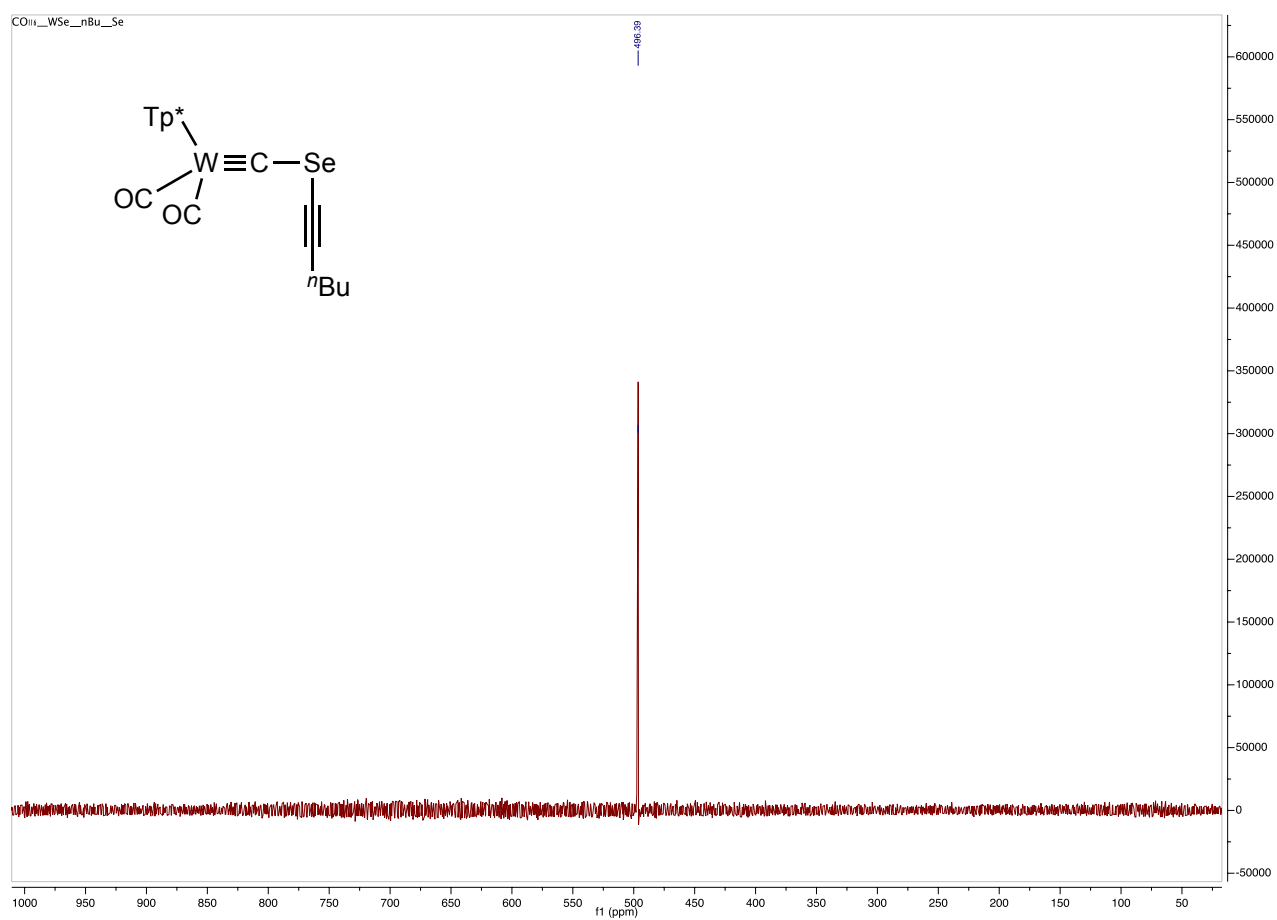

$^{77}\text{Se}\{^1\text{H}\}$  NMR (76 MHz,  $\text{CDCl}_3$ ,  $25^\circ\text{C}$ ,  $\delta$ ) of  $[\text{W}(\equiv\text{CSeC}\equiv\text{C}^n\text{Bu})(\text{CO})_2(\text{Tp}^*)]$  (4).

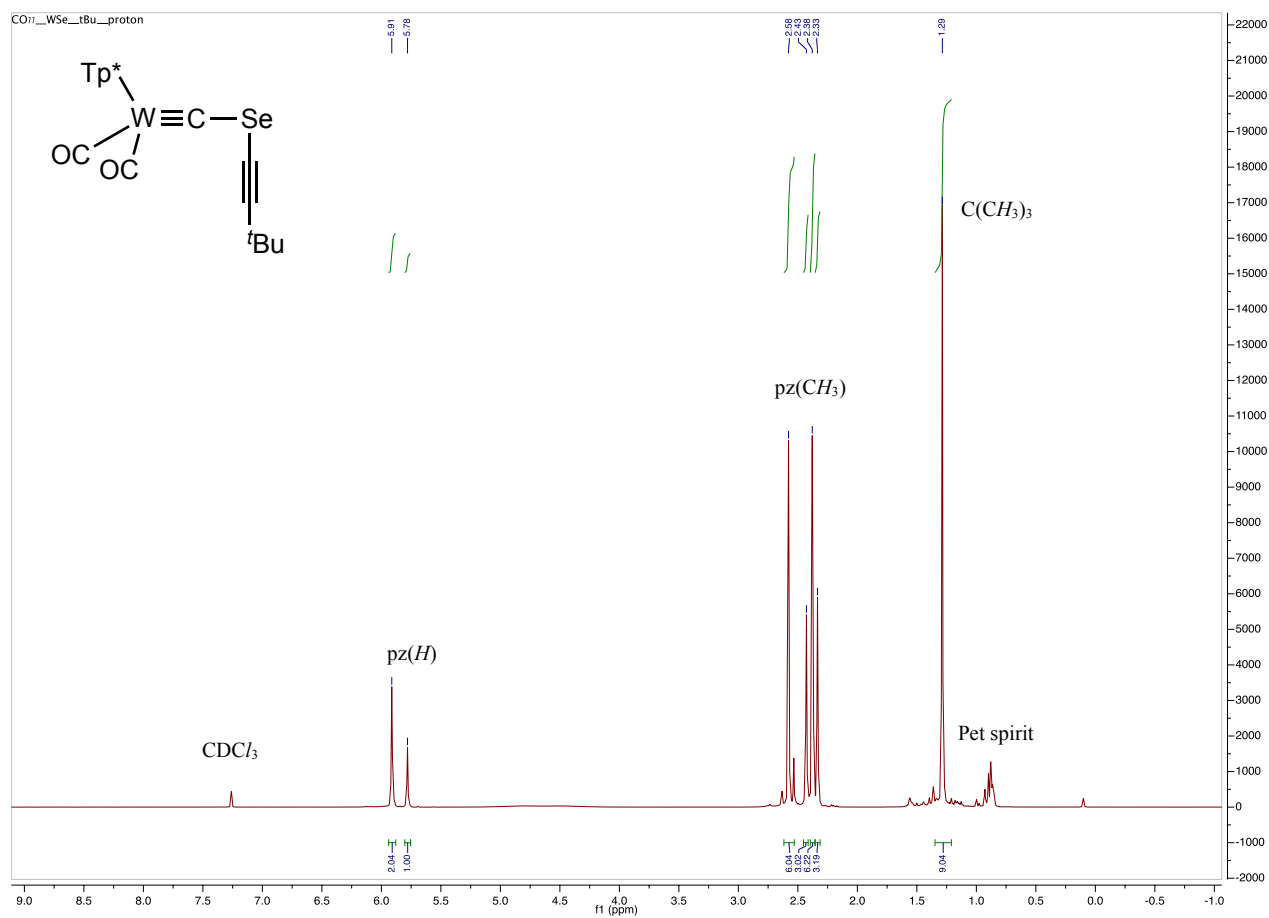

$^1\text{H}$  NMR (400 MHz,  $\text{CDCl}_3$ , 25 °C,  $\delta$ ) of  $[\text{W}(=\text{CSeC}\equiv\text{tBu})(\text{CO})_2(\text{Tp}^*)]$  (5).

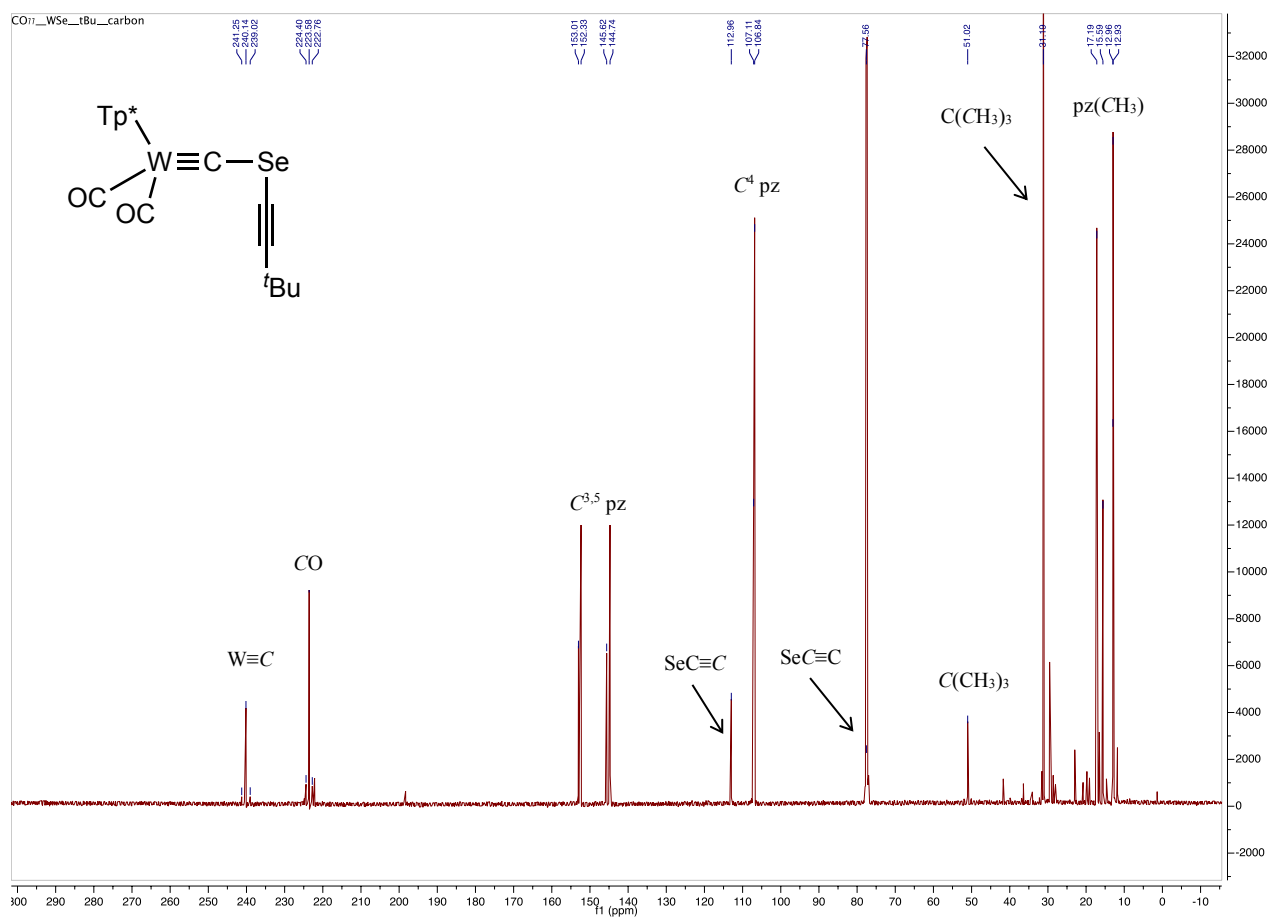

$^{13}C\{^1H\}$  NMR (101 MHz,  $CDCl_3$ , 25°C,  $\delta$ ) of  $[W(=CSeC\equiv tBu)(CO)_2(Tp^*)]$  (5).

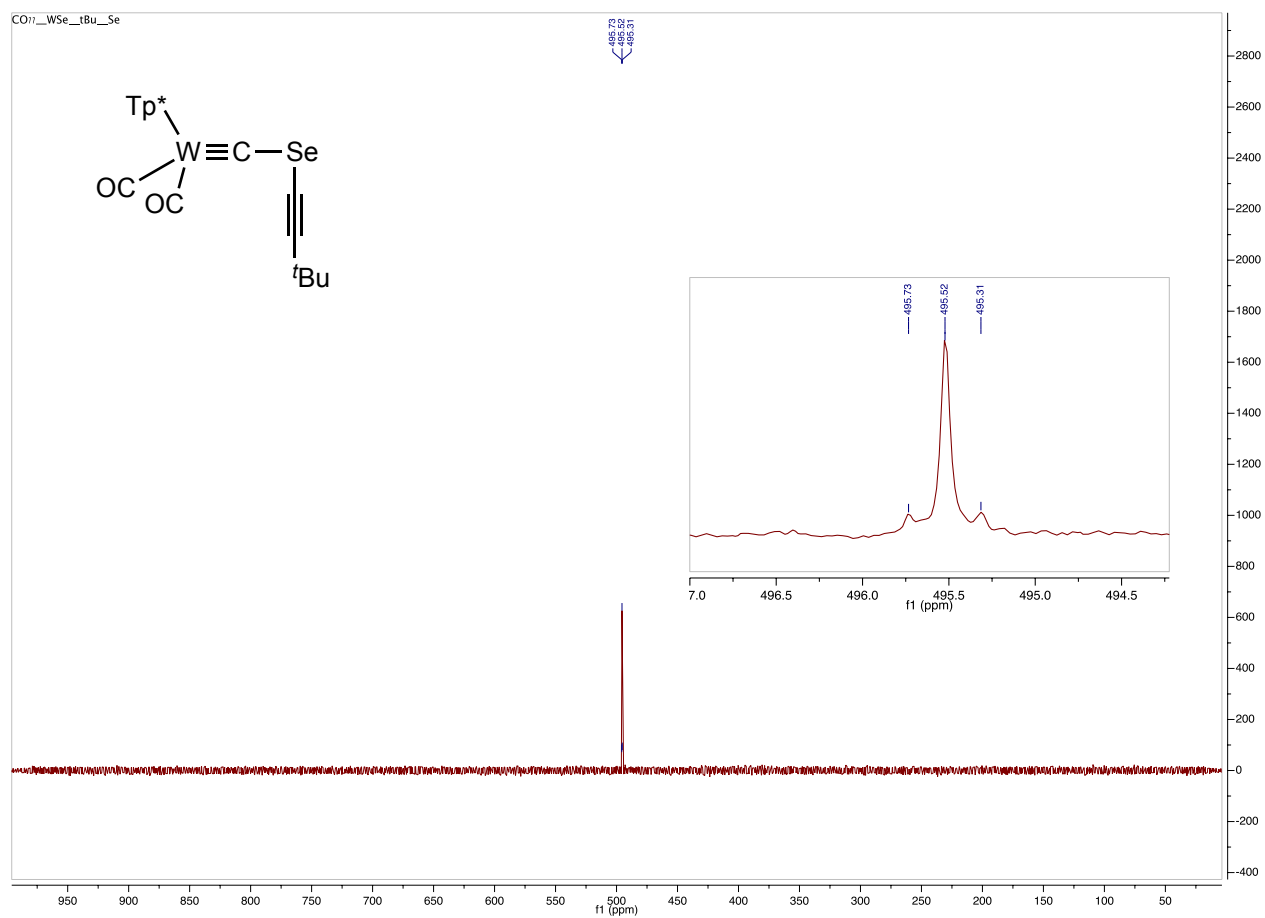

$^{77}\text{Se}\{^1\text{H}\}$  NMR (76 MHz,  $\text{CDCl}_3$ , 25 °C,  $\delta$ ) of  $[\text{W}(\equiv\text{CSeC}\equiv\text{C}^t\text{Bu})(\text{CO})_2(\text{Tp}^*)]$  (5).



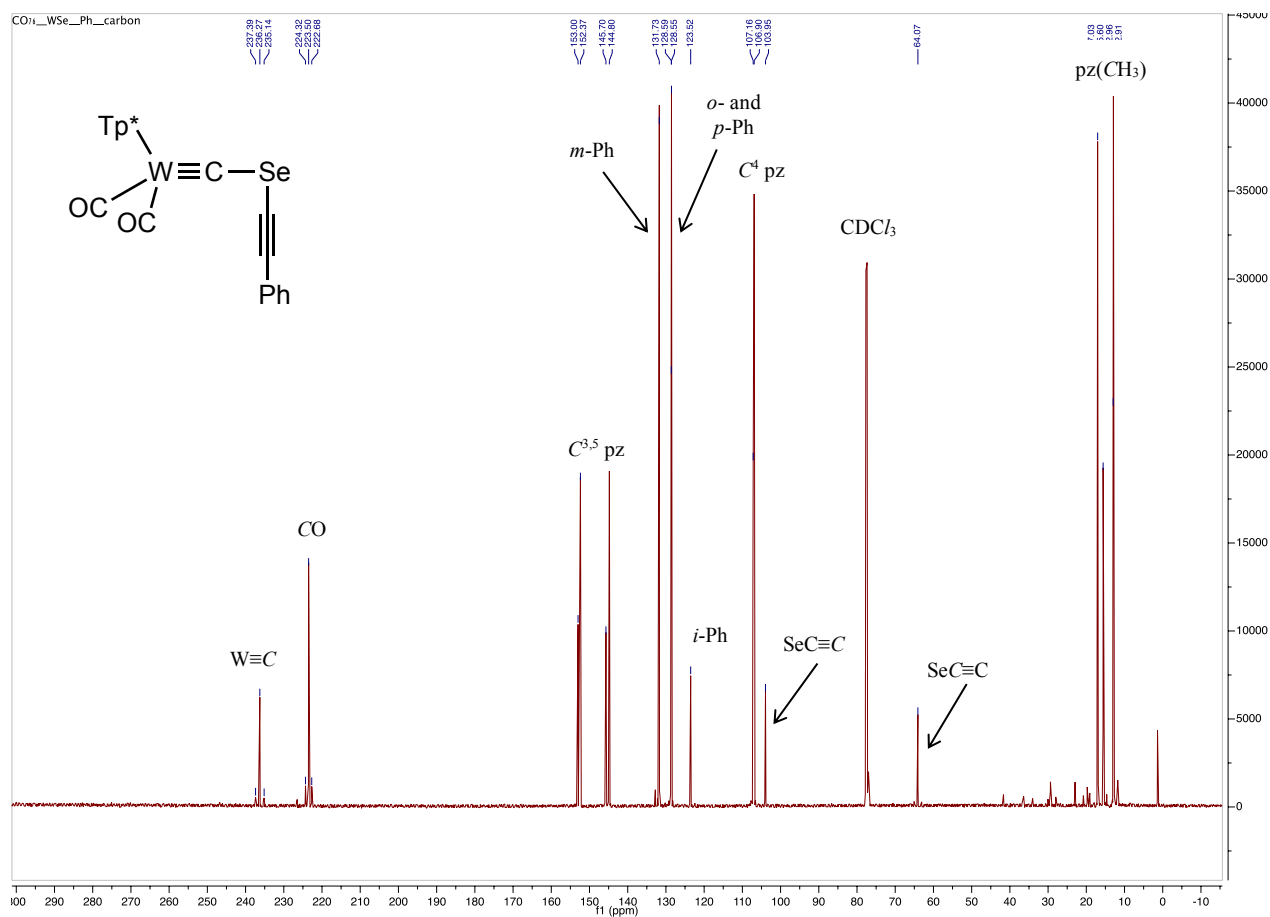

$^{13}C\{^1H\}$  NMR (101 MHz, CDCl<sub>3</sub>, 25°C, δ) of  $[W(=CSeC\equiv CPh)(CO)_2(Tp^*)]$  (6).

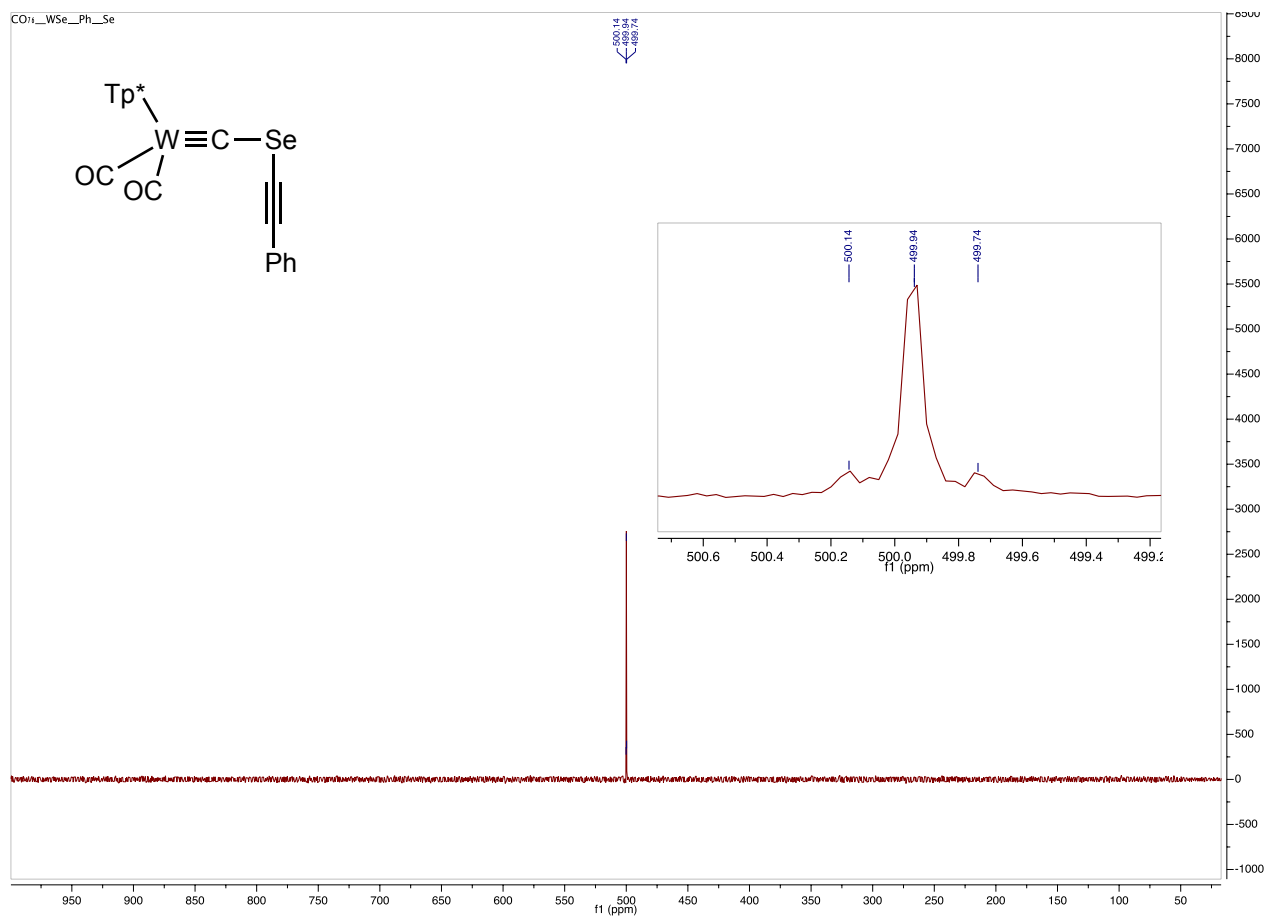

$^{77}\text{Se}\{^1\text{H}\}$  NMR (76 MHz,  $\text{CDCl}_3$ , 25 °C,  $\delta$ ) of  $[\text{W}(\equiv\text{CSeC}\equiv\text{CPh})(\text{CO})_2(\text{Tp}^*)]$  (6).



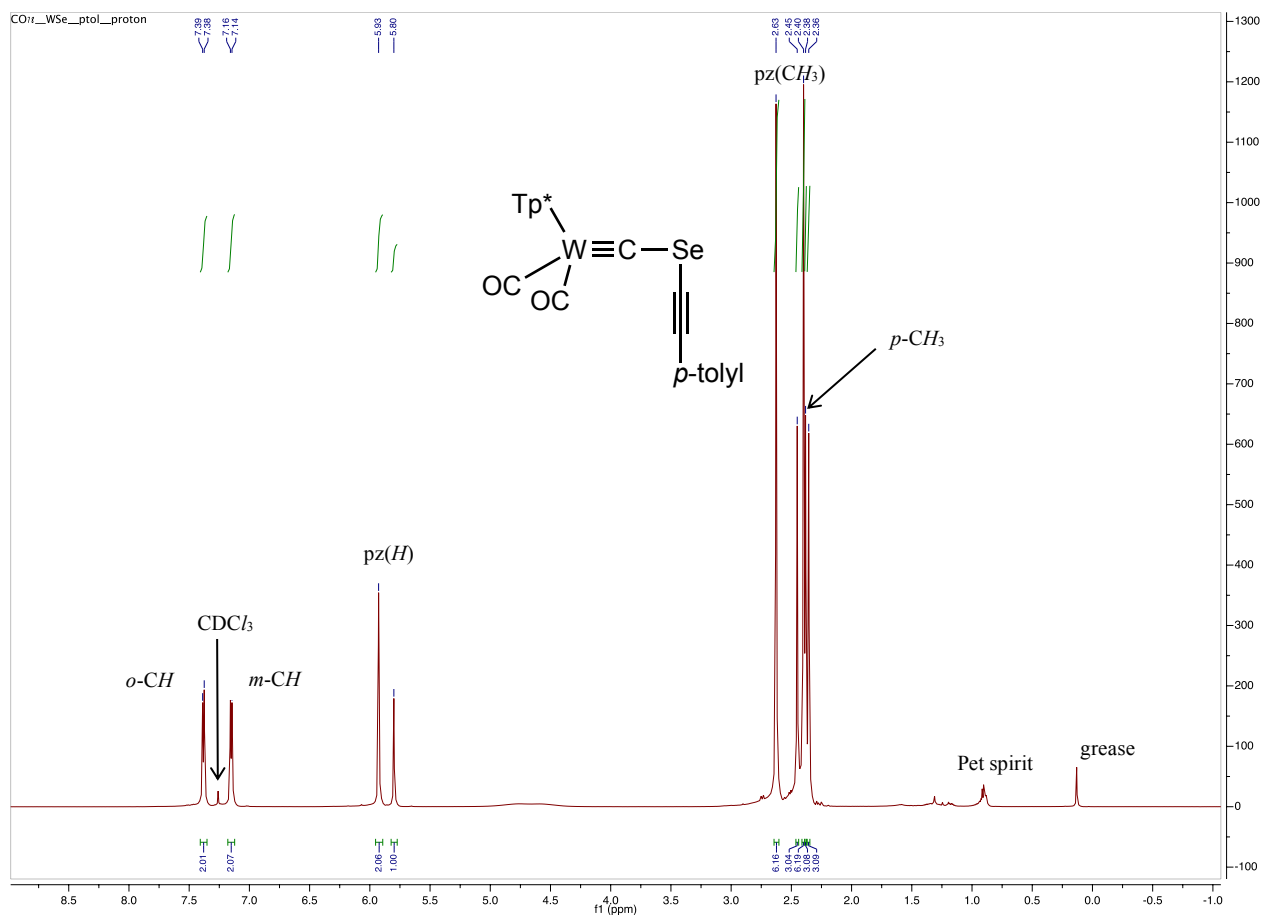

$^1\text{H}$  NMR (600 MHz,  $\text{CDCl}_3$ ,  $25^\circ\text{C}$ ,  $\delta$ ) of  $[\text{W}(\equiv\text{CSeC}\equiv\text{Cp-Tol})(\text{CO})_2(\text{Tp}^*)]$  (7).

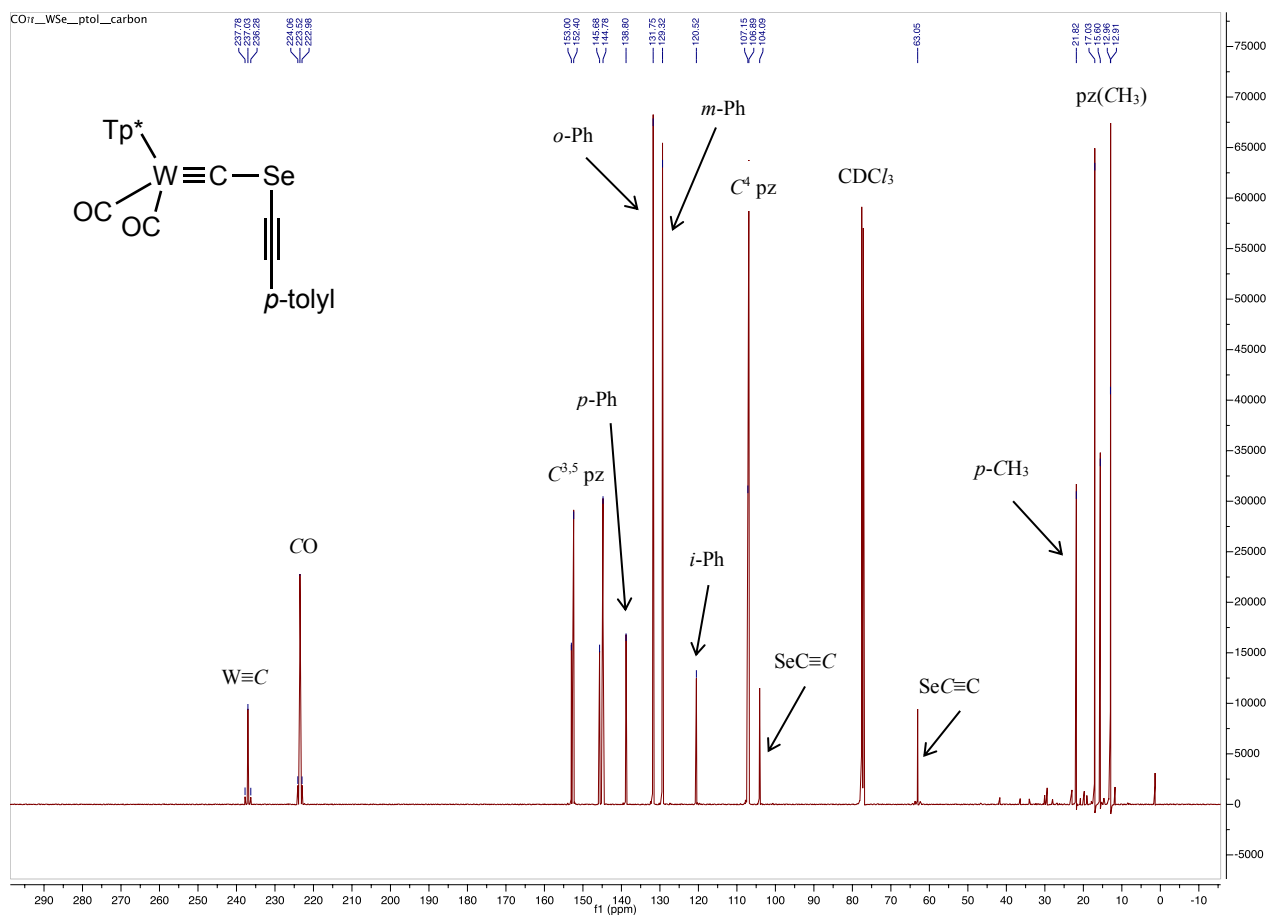

$^{13}\text{C}\{^1\text{H}\}$  NMR (151 MHz,  $\text{CDCl}_3$ , 25°C,  $\delta$ ) of  $[\text{W}(\equiv\text{CSeC}\equiv\text{C}p\text{-Tol})(\text{CO})_2(\text{Tp}^*)]$  (7).

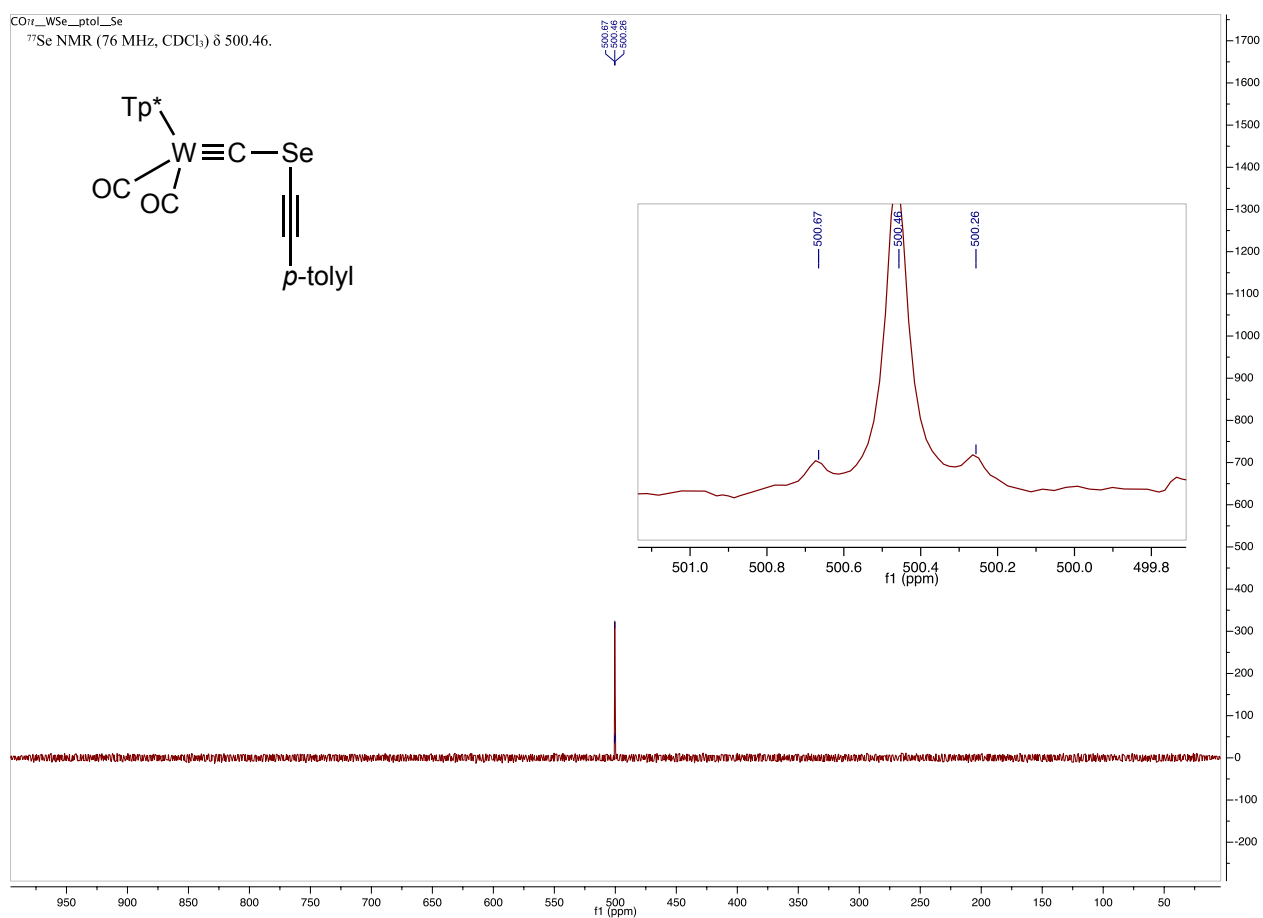

$^{77}\text{Se}\{^1\text{H}\}$  NMR (76 MHz,  $\text{CDCl}_3$ , 25 °C,  $\delta$ ) of  $[\text{W}(\equiv\text{CSeC}\equiv\text{Cp-Tol})(\text{CO})_2(\text{Tp}^*)]$  (7).

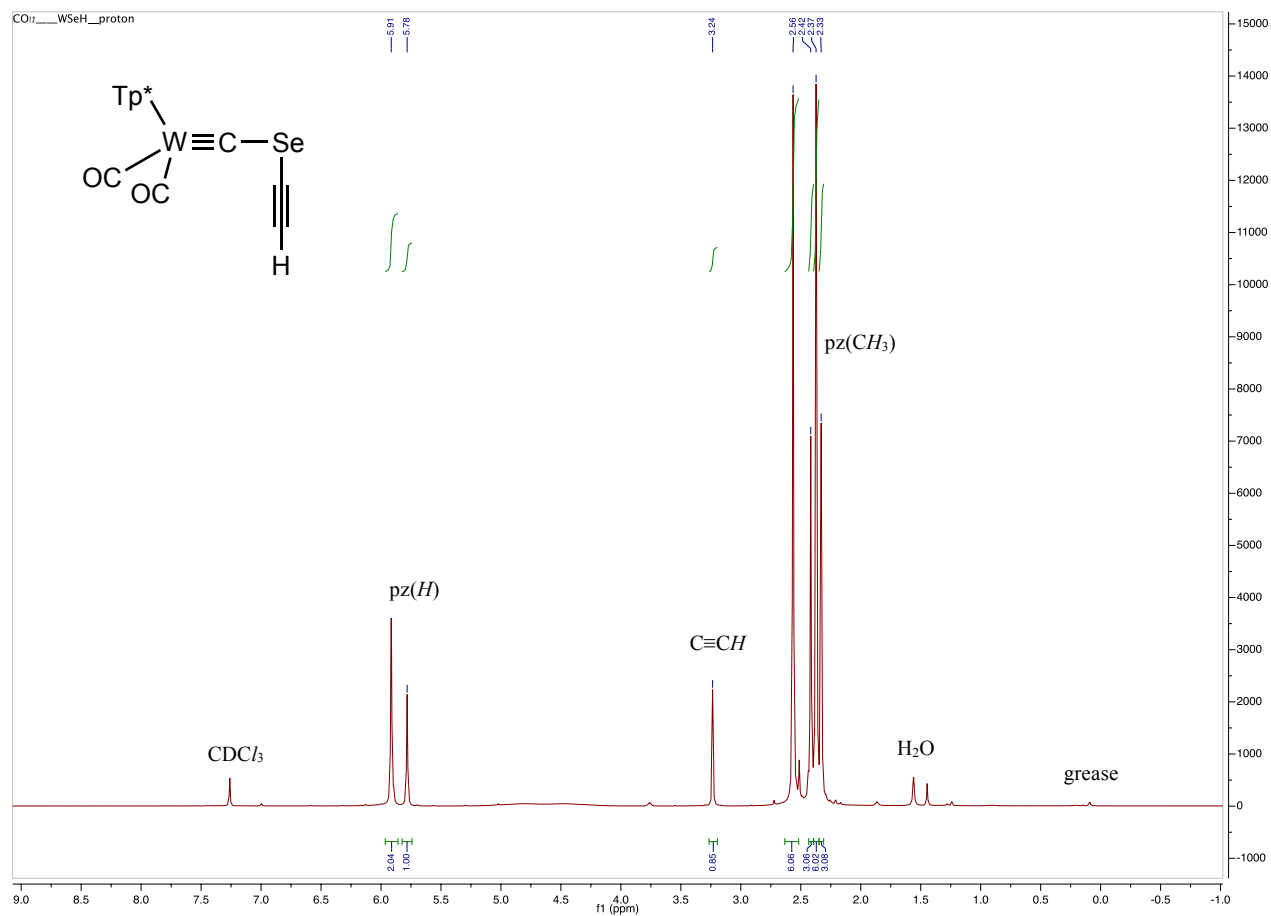

$^1\text{H}$  NMR ( $400\text{ MHz}$ ,  $\text{CDCl}_3$ ,  $25^\circ\text{C}$ ,  $\delta$ ) of  $[\text{W}(\equiv\text{CSe}\equiv\text{CH})(\text{CO})_2(\text{Tp}^*)]$  (**8**).

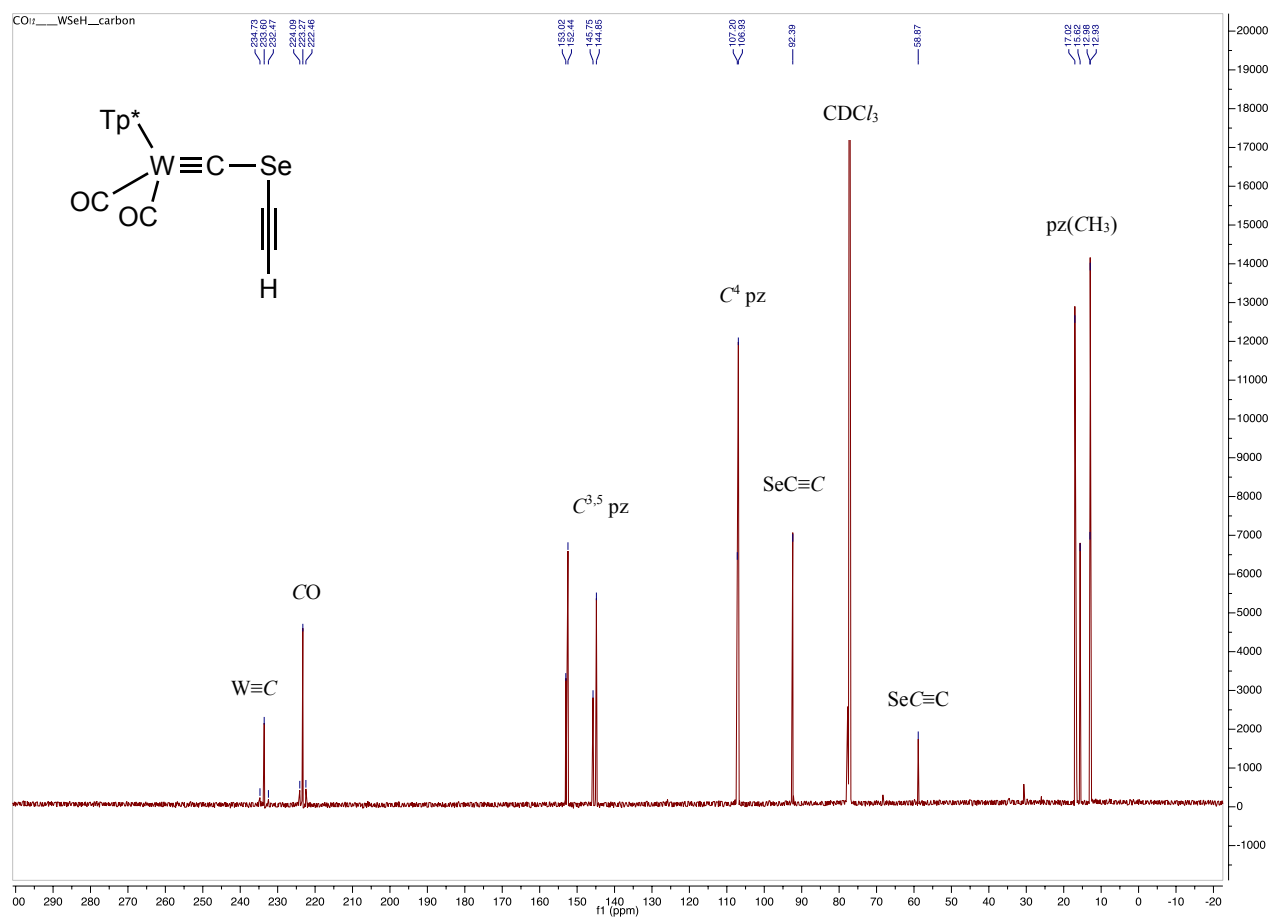

$^{13}C\{^1H\}$  NMR (101 MHz,  $CDCl_3$ , 25°C,  $\delta$ ) of  $[W(=CSeC\equiv CH)(CO)_2(Tp^*)]$  (8).

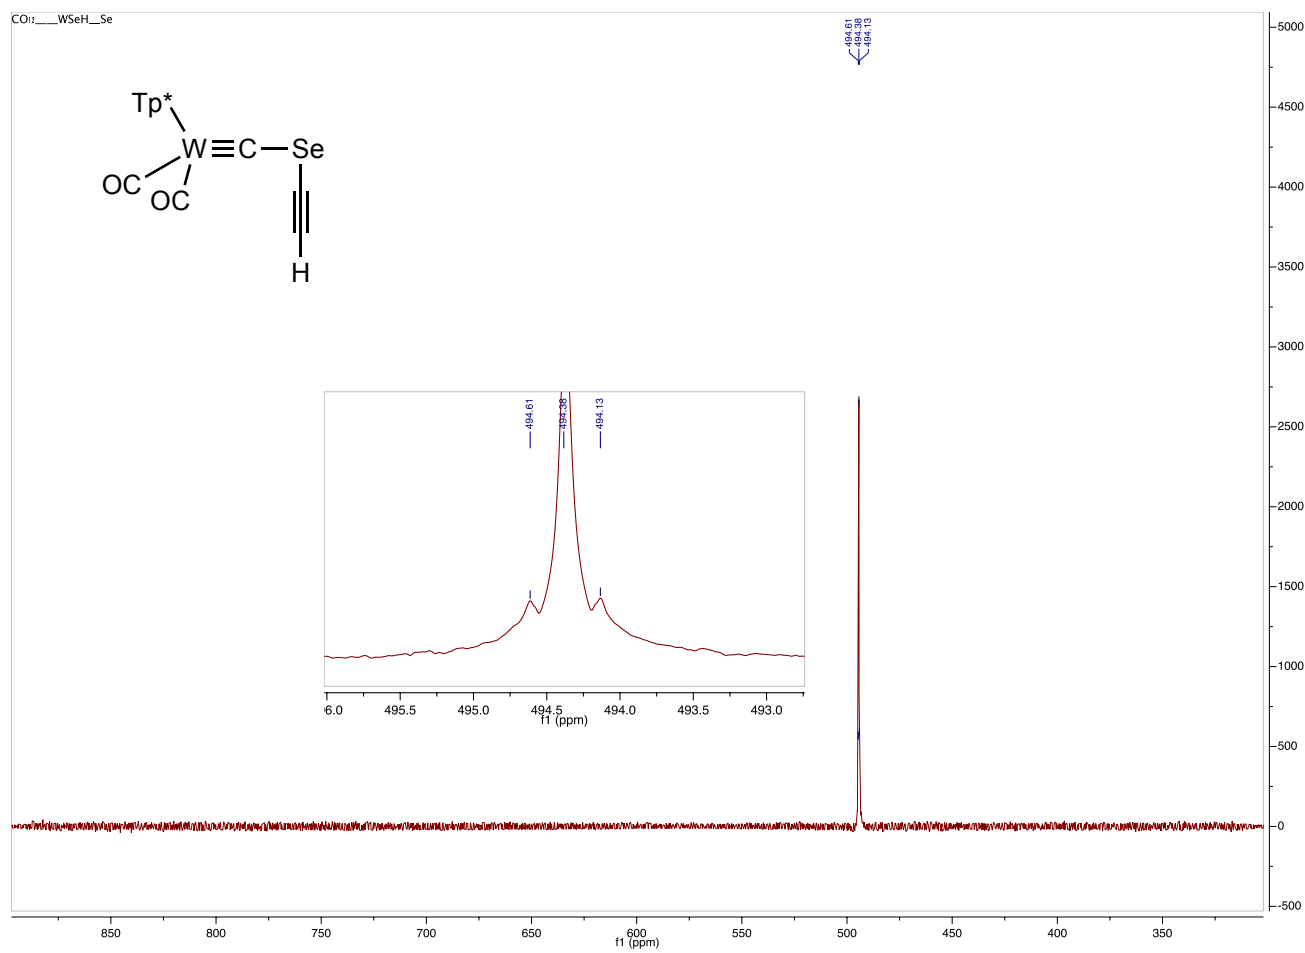

$^{77}\text{Se}\{^1\text{H}\}$  NMR (76 MHz,  $\text{CDCl}_3$ ,  $25^\circ\text{C}$ ,  $\delta$ ) of  $[\text{W}(\equiv\text{CSeC}\equiv\text{H})(\text{CO})_2(\text{Tp}^*)]$  (**8**).

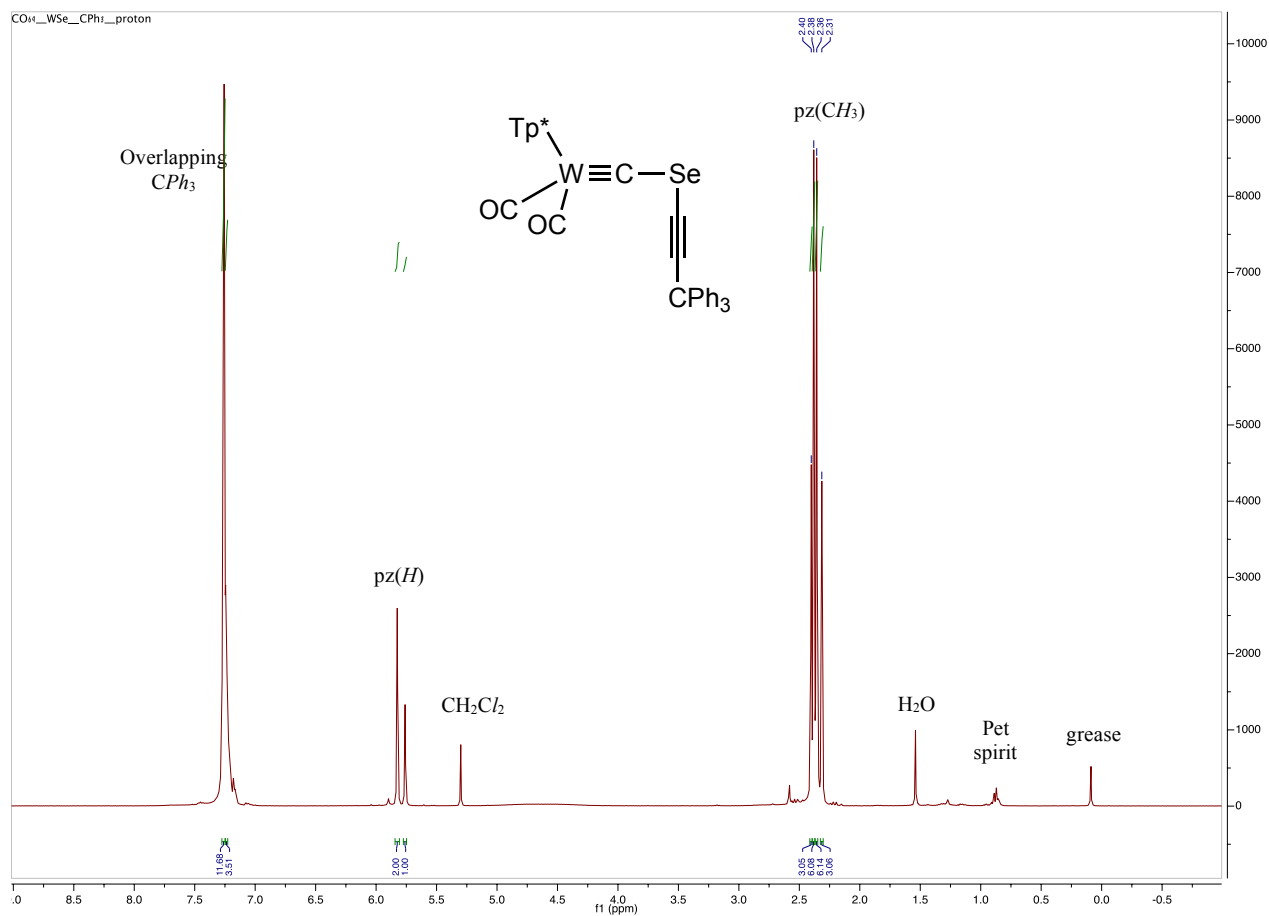

$^1\text{H}$  NMR (700 MHz,  $\text{CDCl}_3$ , 25°C,  $\delta$ ) of  $[\text{W}(\equiv\text{CSeC}\equiv\text{CPh}_3)(\text{CO})_2(\text{Tp}^*)]$  (9).

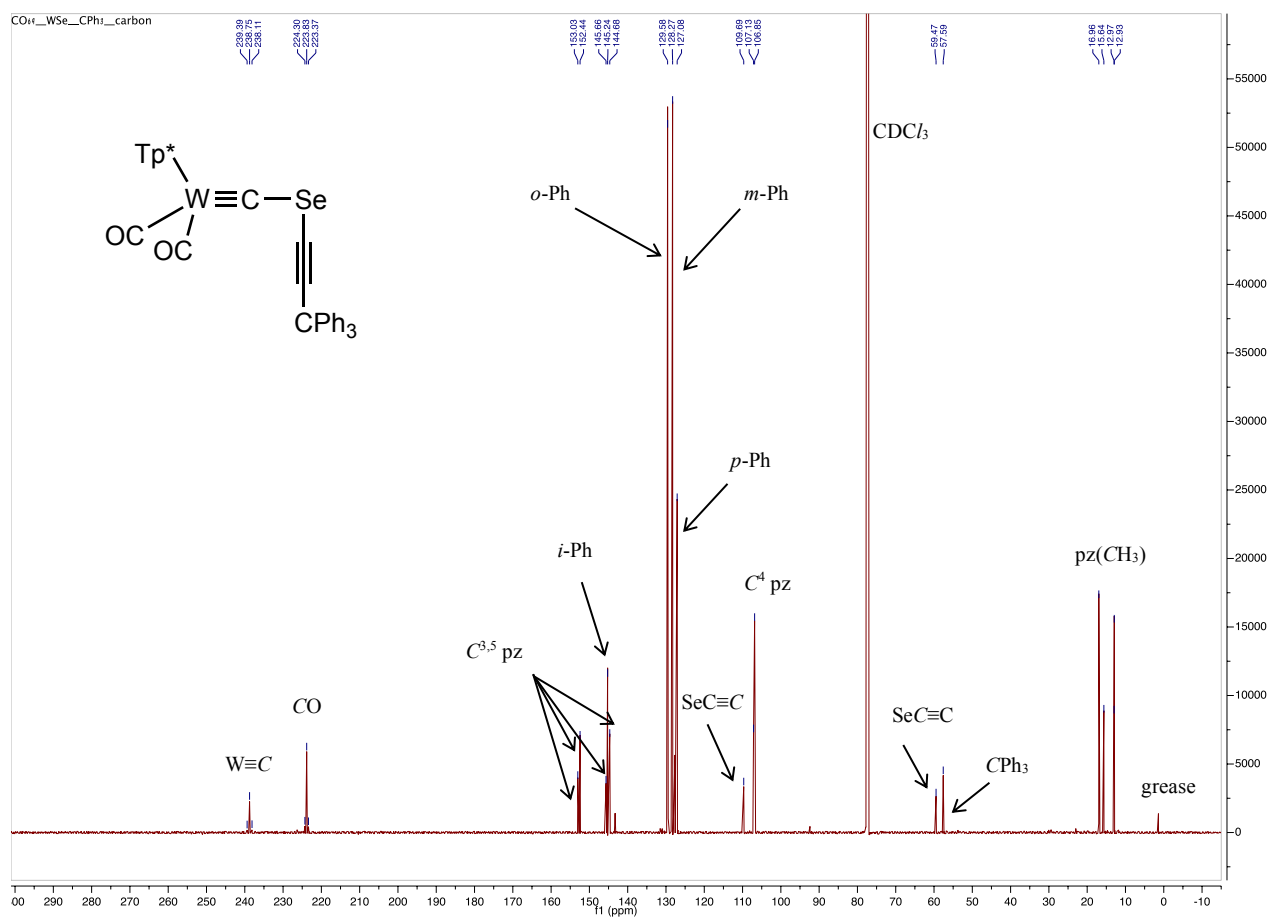

$^{13}\text{C}\{^1\text{H}\}$  NMR (176 MHz, CDCl<sub>3</sub>, 25°C,  $\delta$ ) of [W( $\equiv$ CSeC $\equiv$ CCPh<sub>3</sub>)(CO)<sub>2</sub>(Tp\*)] (**9**).



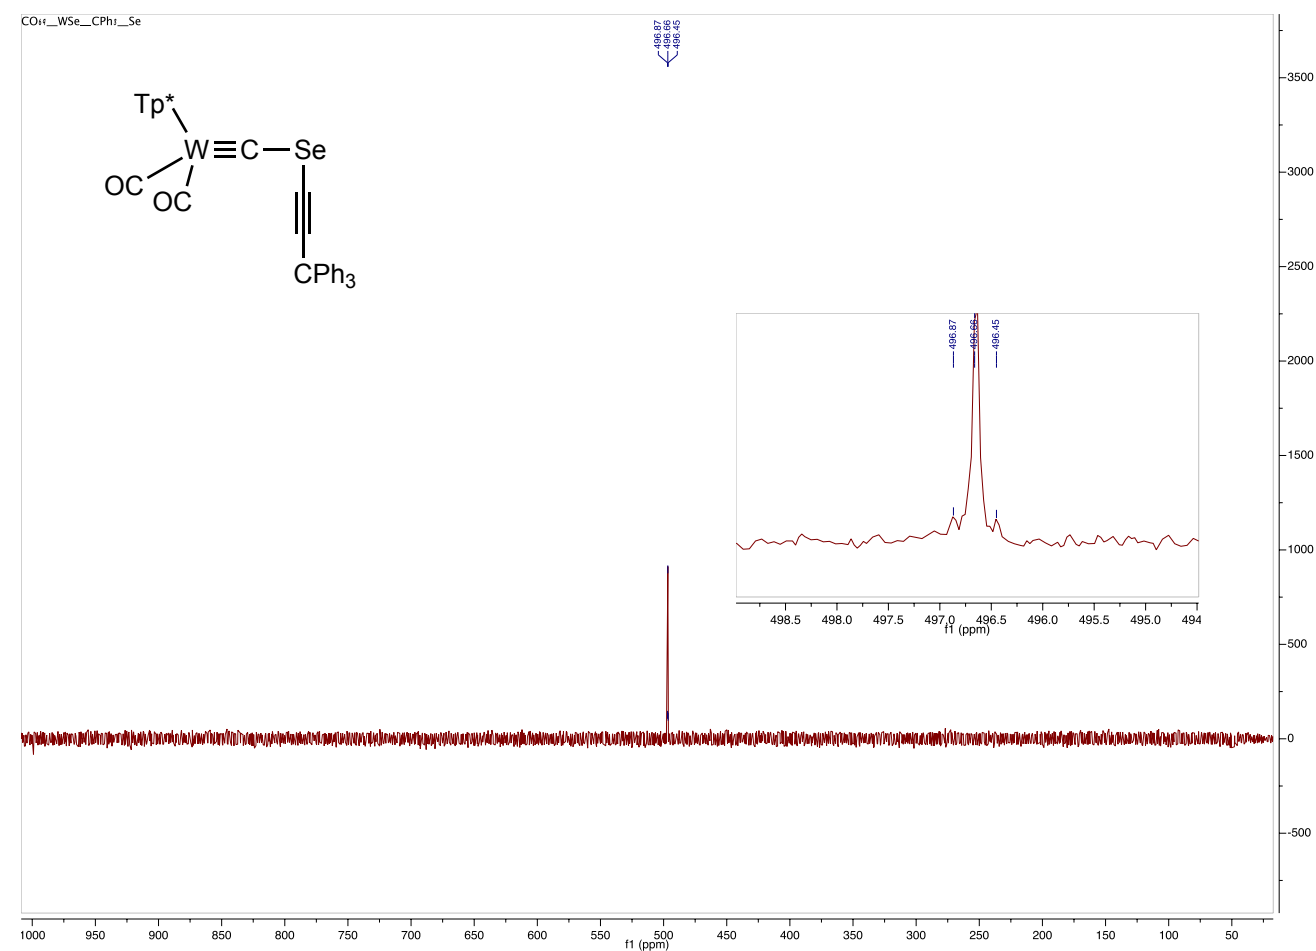

$^{77}\text{Se}\{^1\text{H}\}$  NMR (76 MHz,  $\text{CDCl}_3$ ,  $25^\circ\text{C}$ ,  $\delta$ ) of  $[\text{W}(\equiv\text{CSeC}\equiv\text{CPh}_3)(\text{CO})_2(\text{Tp}^*)]$  (**9**).

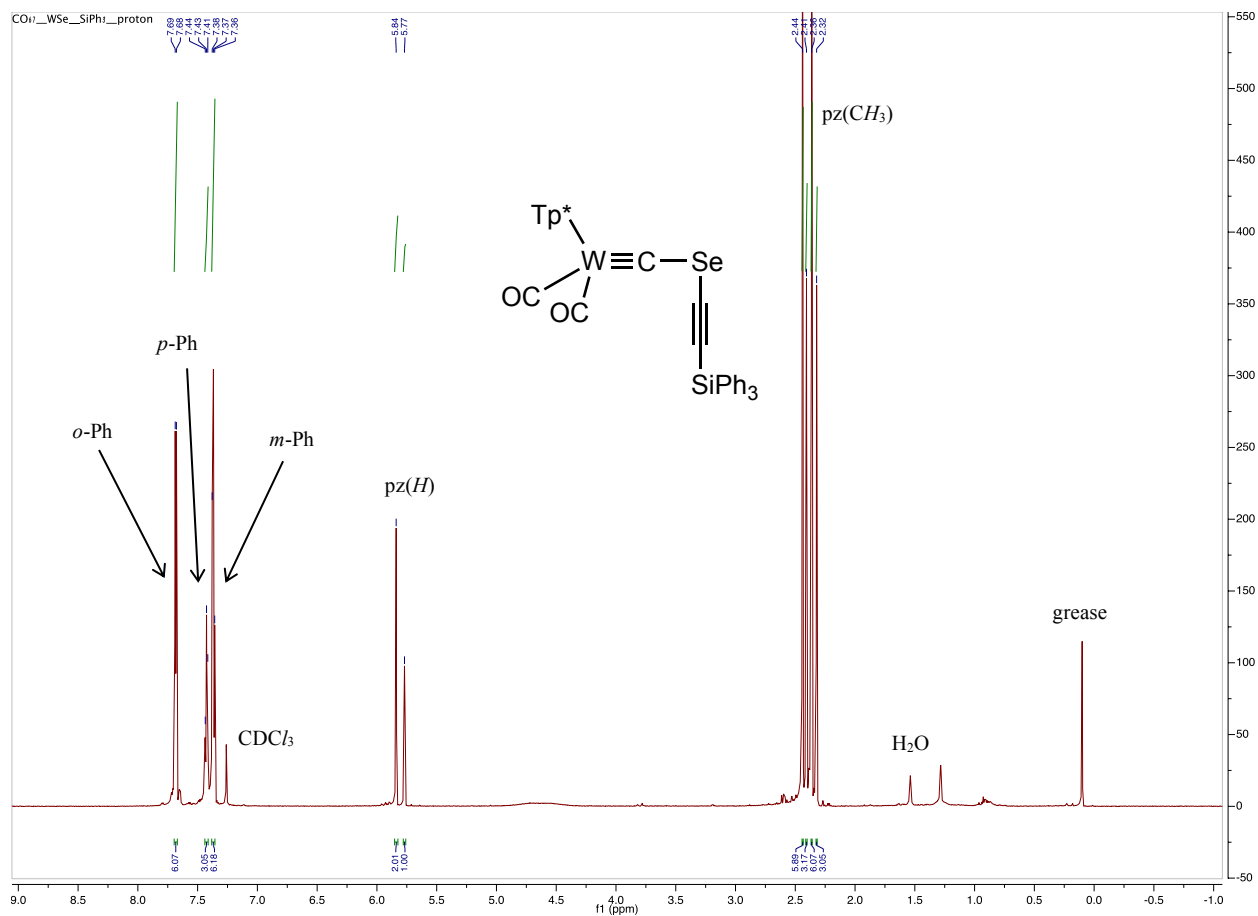

$^1\text{H}$  NMR (700 MHz,  $\text{CDCl}_3$ ,  $25^\circ\text{C}$ ,  $\delta$ ) of  $[\text{W}(\equiv\text{CSeC}\equiv\text{CSiPh}_3)(\text{CO})_2(\text{Tp}^*)]$  (**10**).

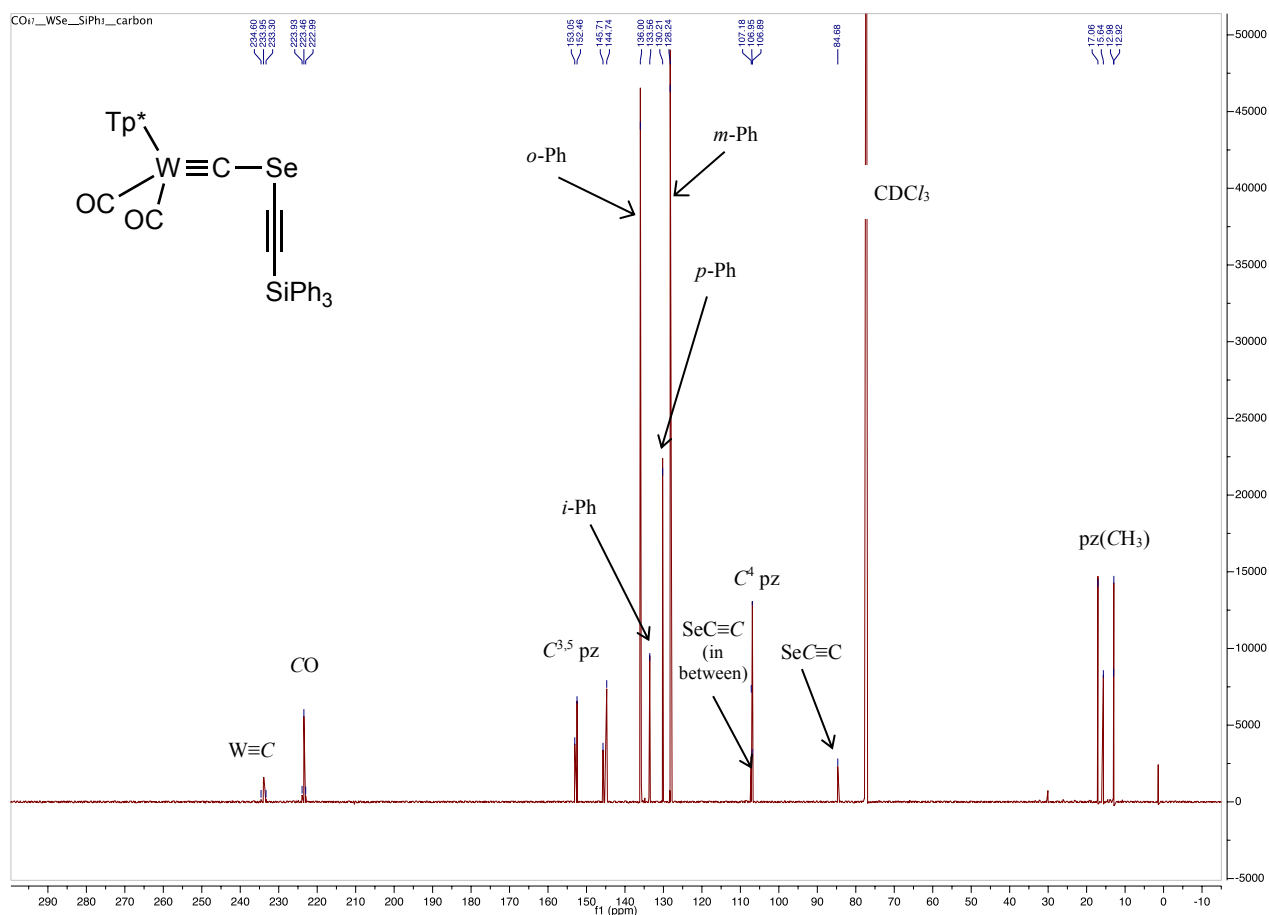

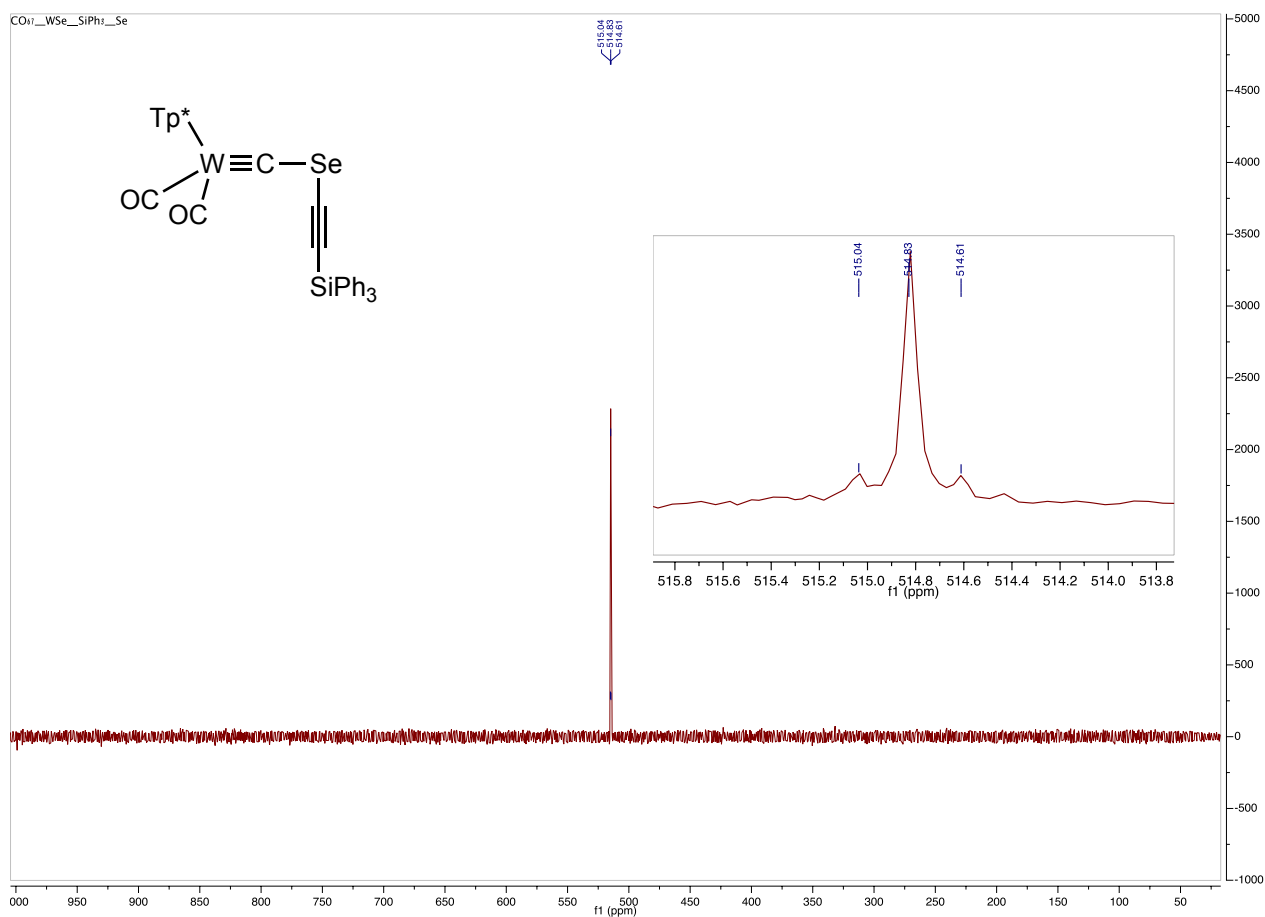

$^{77}\text{Se}\{^1\text{H}\}$  NMR (76 MHz,  $\text{CDCl}_3$ ,  $25^\circ\text{C}$ ,  $\delta$ ) of  $[\text{W}(\equiv\text{CSeC}\equiv\text{CSiPh}_3)(\text{CO})_2(\text{Tp}^*)]$  (**10**).

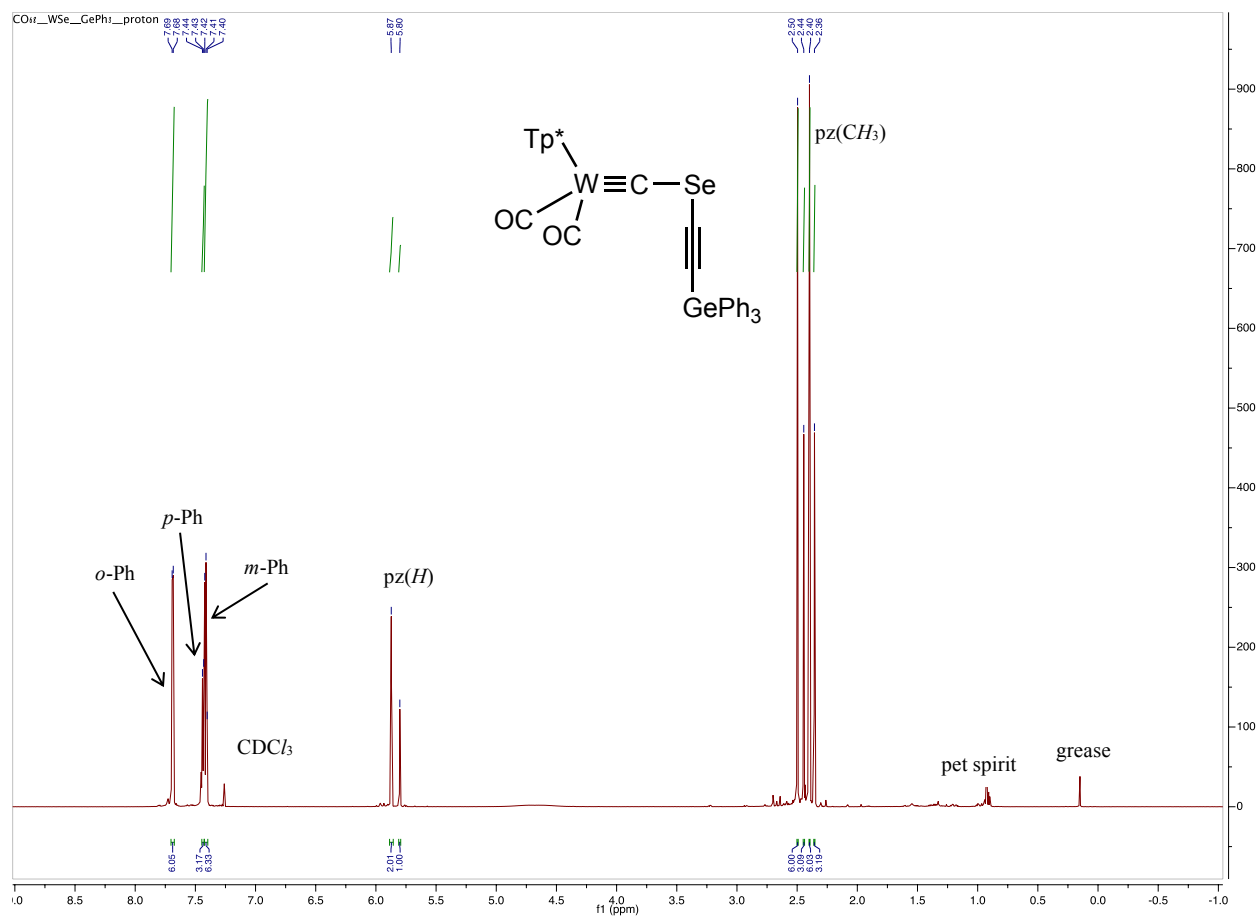

$^1\text{H}$  NMR (700 MHz,  $\text{CDCl}_3$ , 25°C,  $\delta$ ) of  $[\text{W}(=\text{CSeC}=\text{GePh}_3)(\text{CO})_2(\text{Tp}^*)]$  (11).

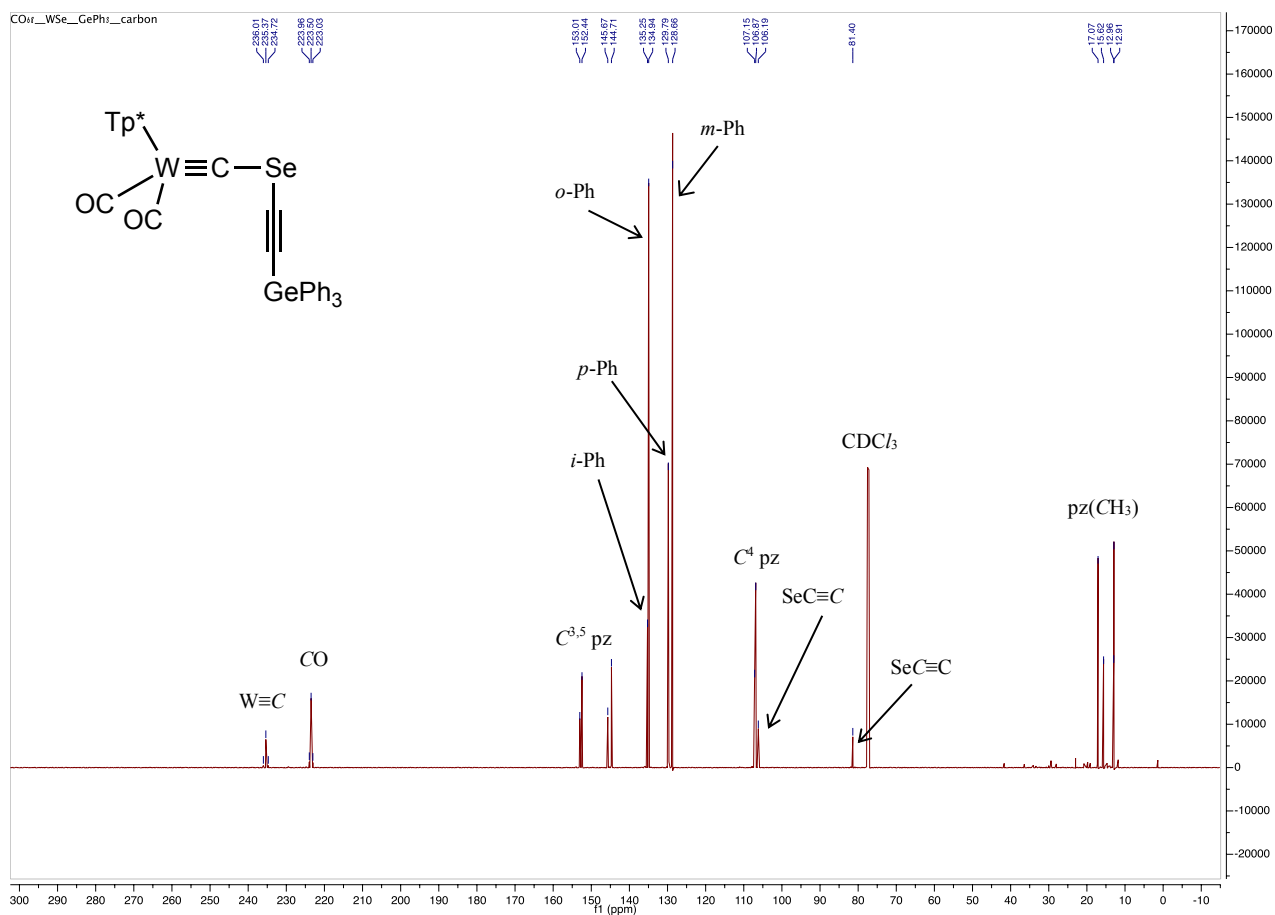

$^{13}C\{^1H\}$  NMR (176 MHz,  $CDCl_3$ , 25 °C,  $\delta$ ) of  $[W(=CSe\equiv CGePh_3)(CO)_2(Tp^*)]$  (**11**).

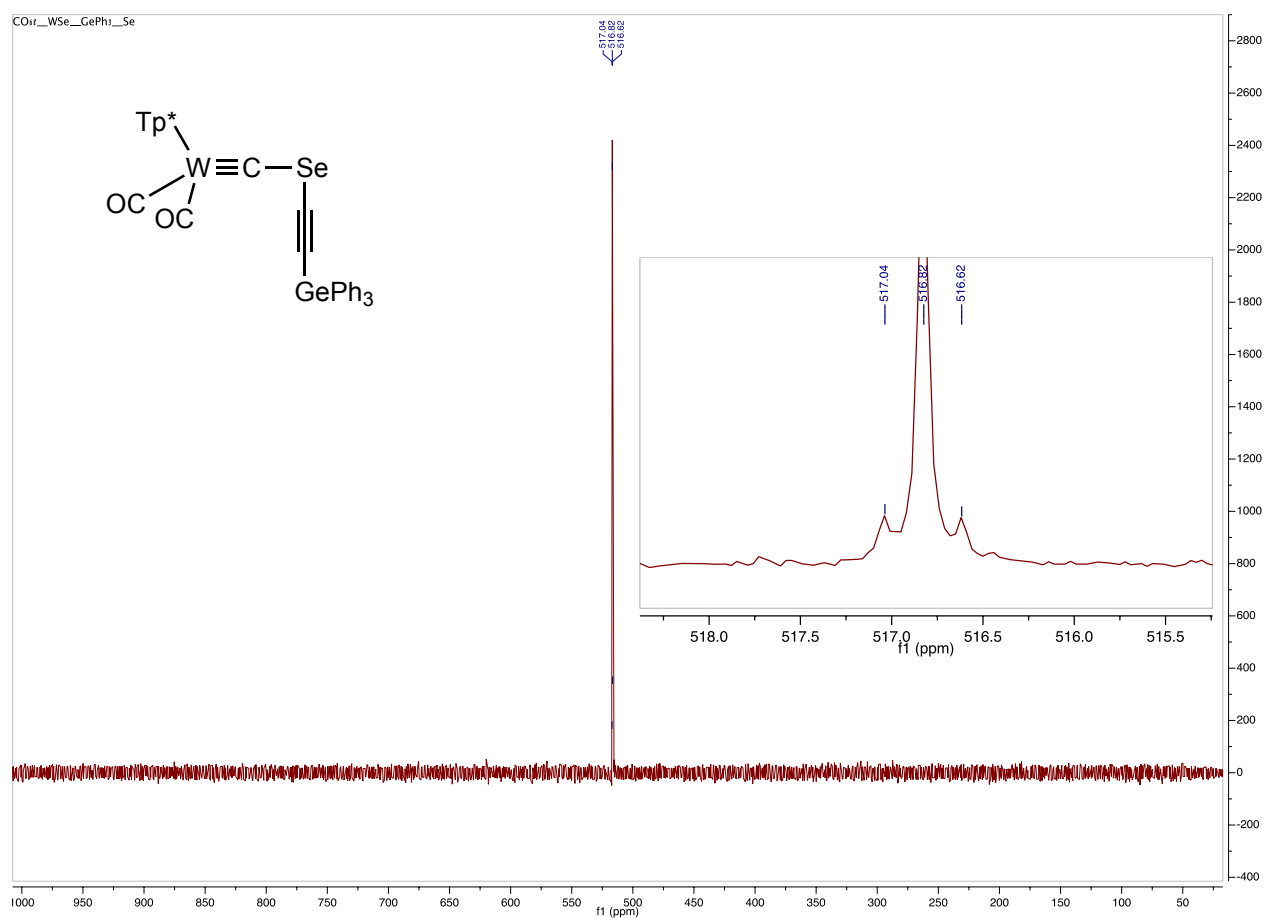

$^{77}\text{Se}\{^1\text{H}\}$  NMR (76 MHz,  $\text{CDCl}_3$ , 25 °C,  $\delta$ ) of  $[\text{W}(\equiv\text{CSeC}\equiv\text{CGePh}_3)(\text{CO})_2(\text{Tp}^*)]$  (**11**).

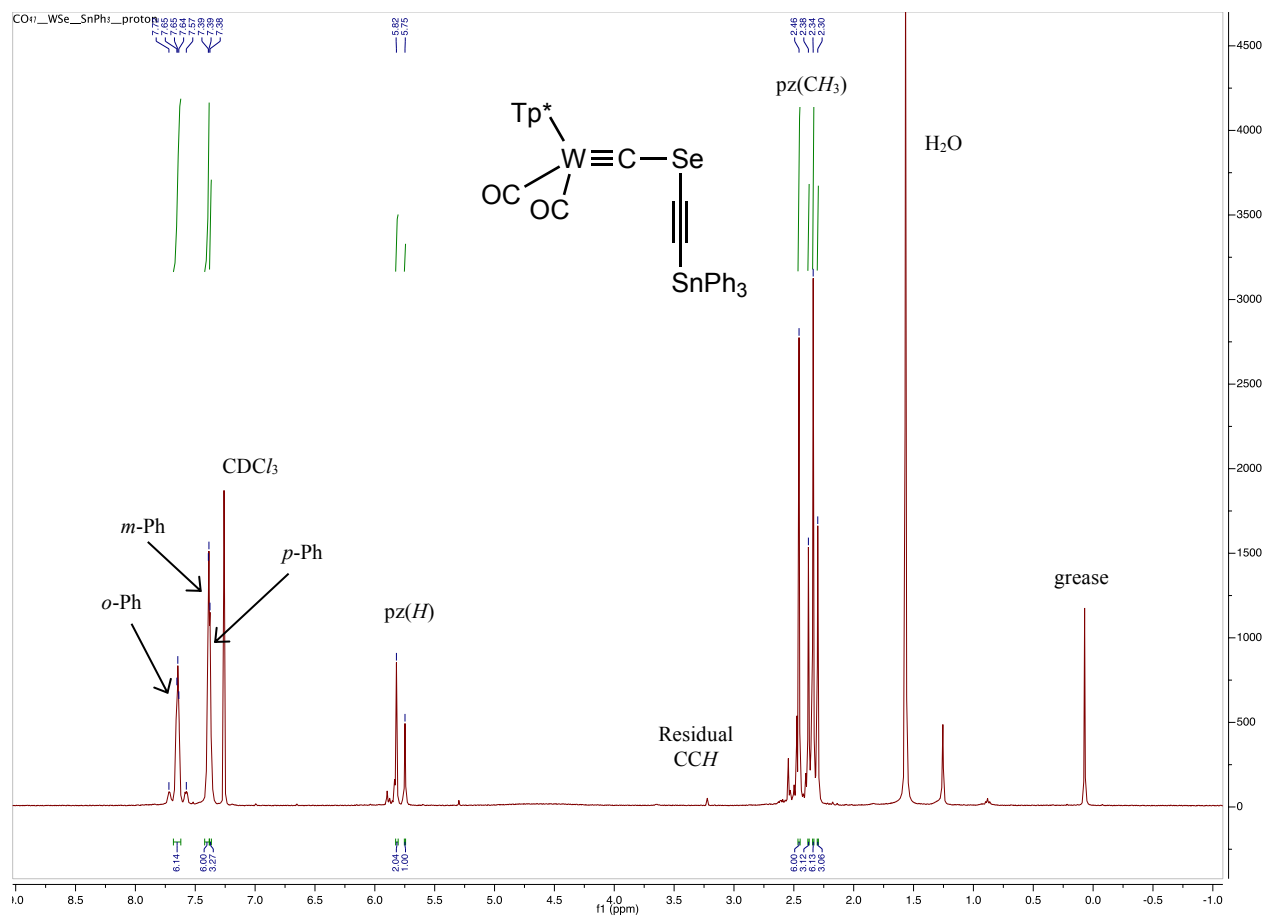

$^1\text{H}$  NMR (600 MHz,  $\text{CDCl}_3$ , 25°C,  $\delta$ ) of  $[\text{W}(\equiv\text{CSeC}\equiv\text{CSnPh}_3)(\text{CO})_2(\text{Tp}^*)]$  (**12**).





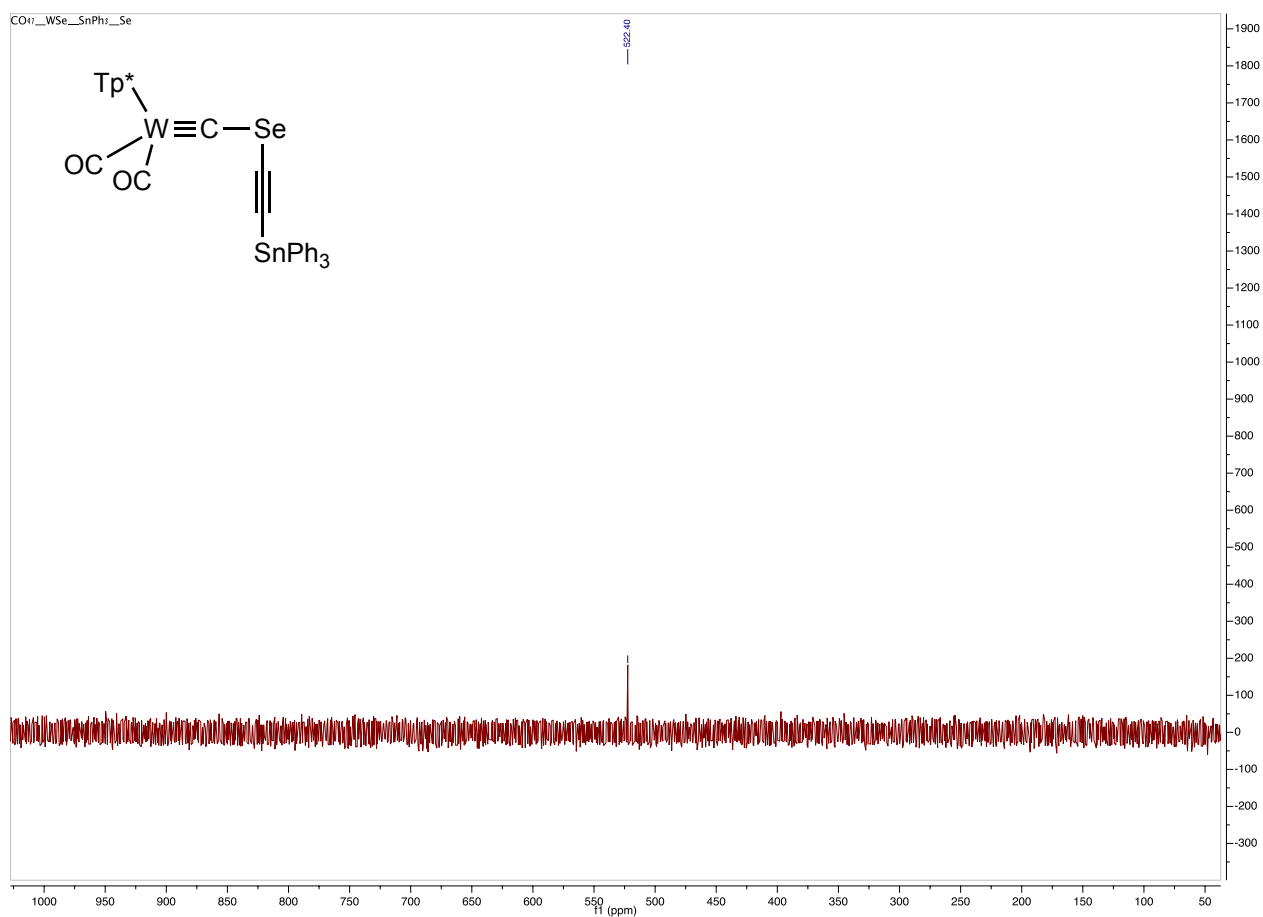

$^{77}\text{Se}\{^1\text{H}\}$  NMR (76 MHz,  $\text{CDCl}_3$ , 25 °C,  $\delta$ ) of  $[\text{W}(\equiv\text{CSeC}\equiv\text{CSnPh}_3)(\text{CO})_2(\text{Tp}^*)]$  (**12**).

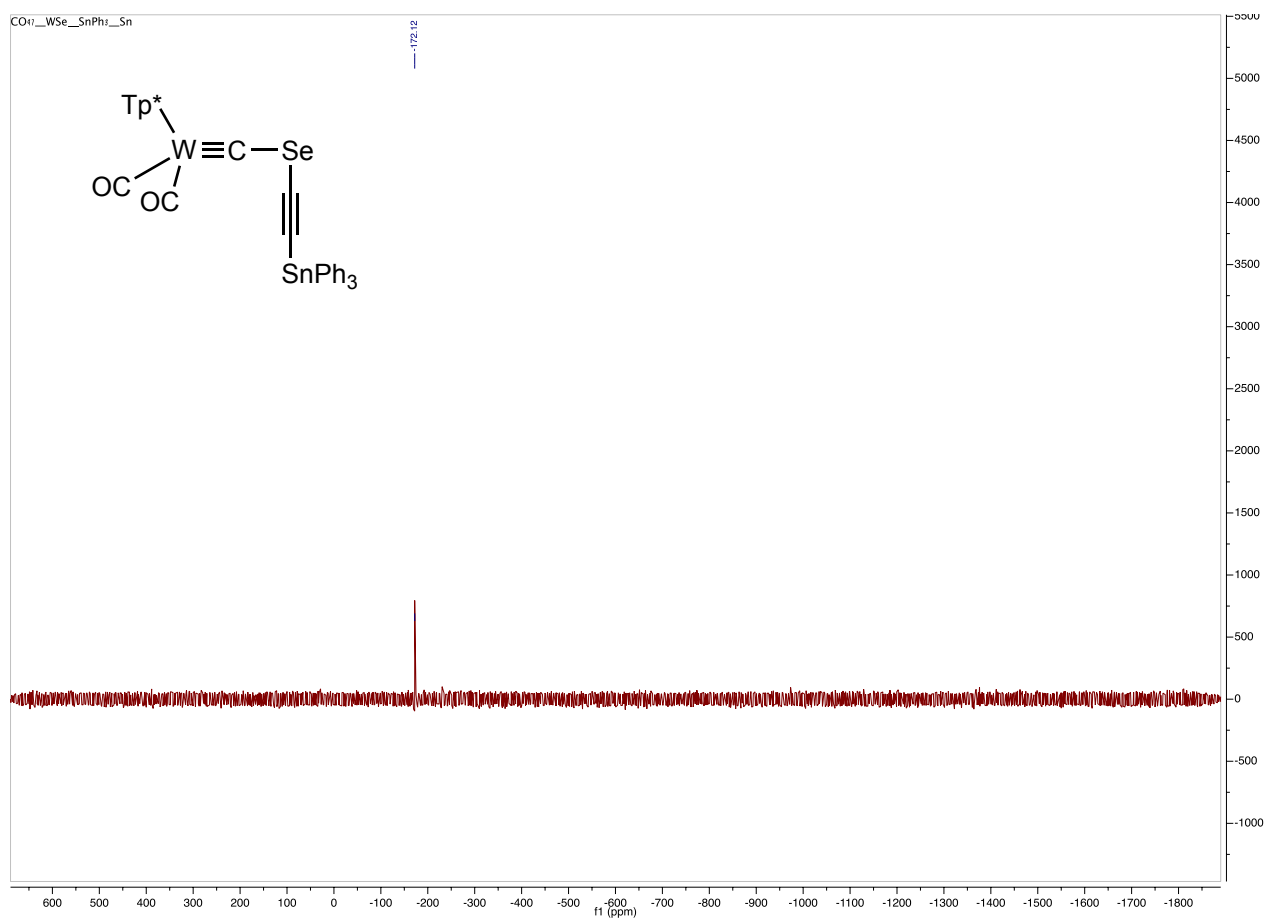

$^{119}\text{Sn}$  NMR (149 MHz,  $\text{CDCl}_3$ , 25 °C,  $\delta$ ) of  $[\text{W}(\equiv\text{CSeC}\equiv\text{CSnPh}_3)(\text{CO})_2(\text{Tp}^*)]$  (12).

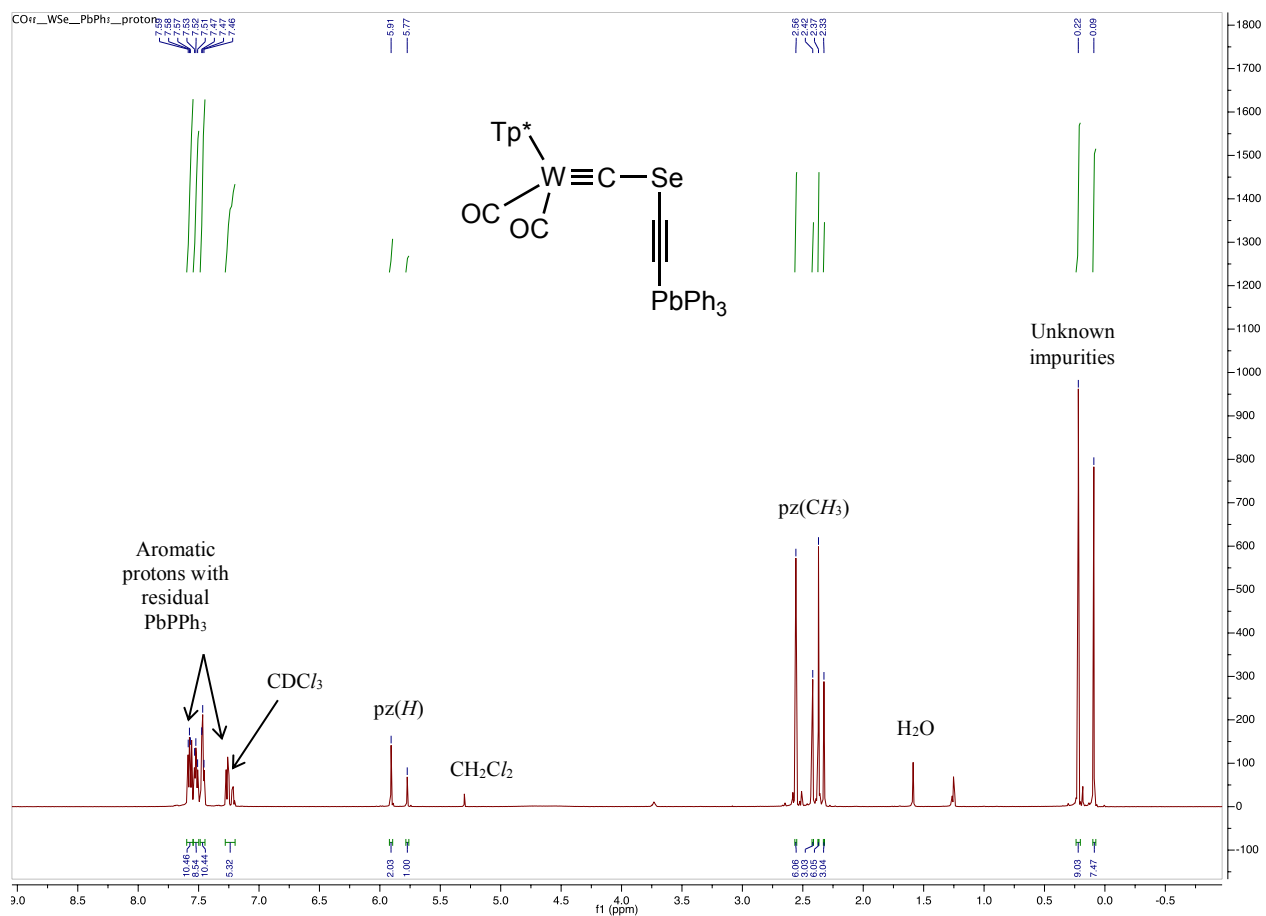

$^1\text{H}$  NMR (400 MHz,  $\text{CDCl}_3$ , 25 °C,  $\delta$ ) of  $[\text{W}(\equiv\text{CSeC}\equiv\text{CPbPh}_3)(\text{CO})_2(\text{Tp}^*)]$  (**13**).



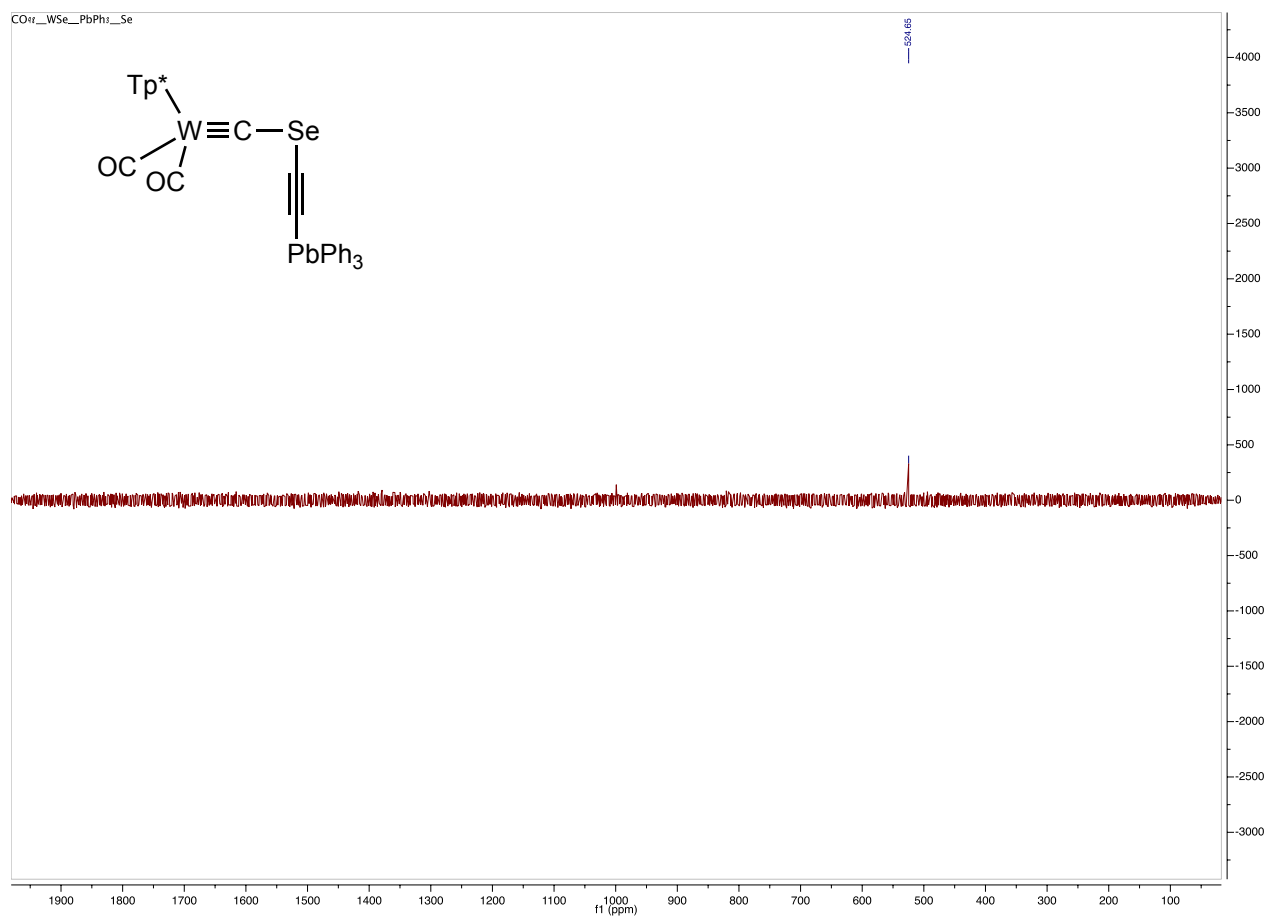

$^{77}\text{Se}\{^1\text{H}\}$  NMR (76 MHz,  $\text{CDCl}_3$ , 25 °C,  $\delta$ ) of  $[W(\equiv CSeC\equiv CPbPh_3)(CO)_2(Tp^*)]$  (**13**).

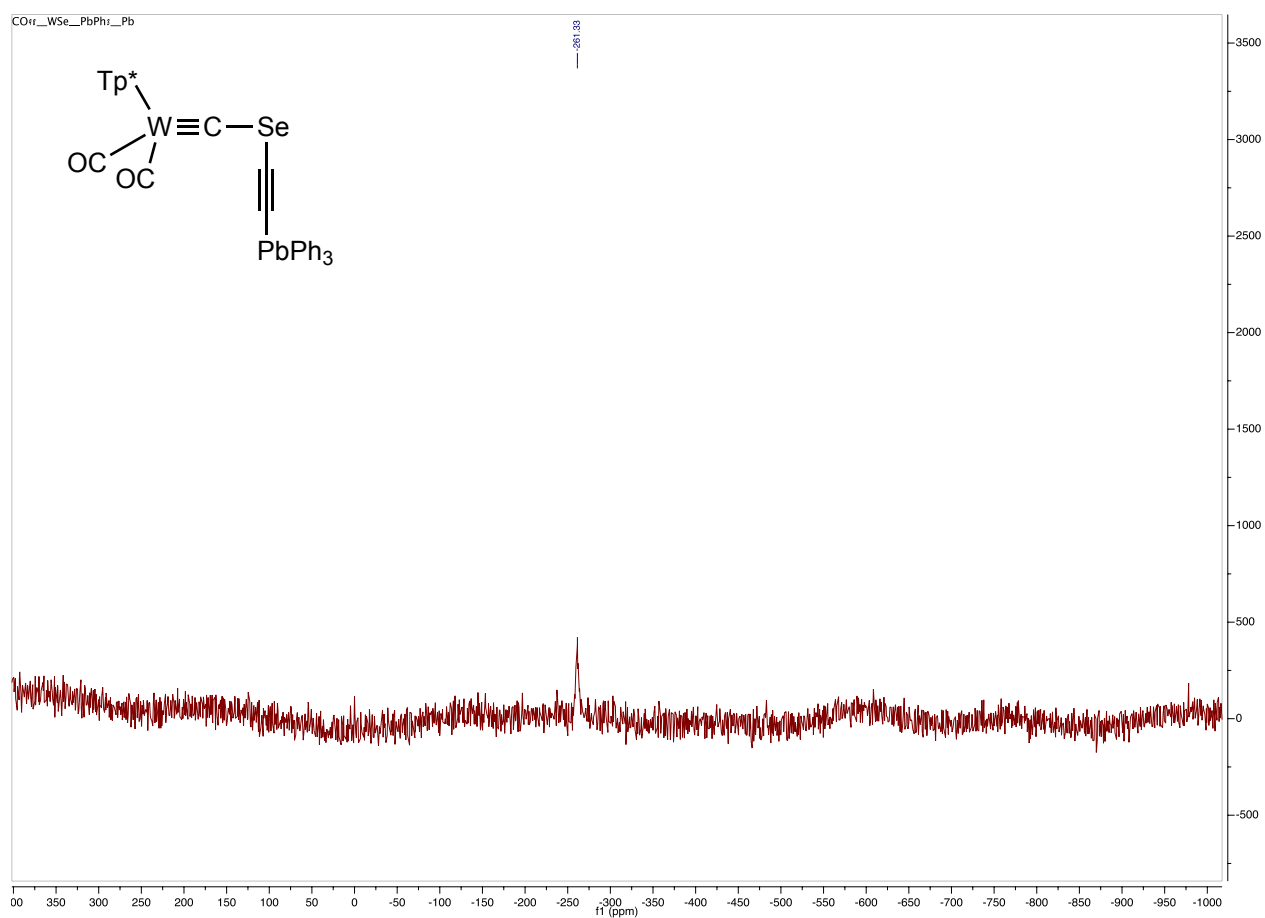

$^{207}\text{Pb}$  NMR (84 MHz,  $\text{CDCl}_3$ ,  $25^\circ\text{C}$ ,  $\delta$ ) of  $[\text{W}(\equiv\text{CSeC}\equiv\text{CPbPh}_3)(\text{CO})_2(\text{Tp}^*)]$  (**13**).

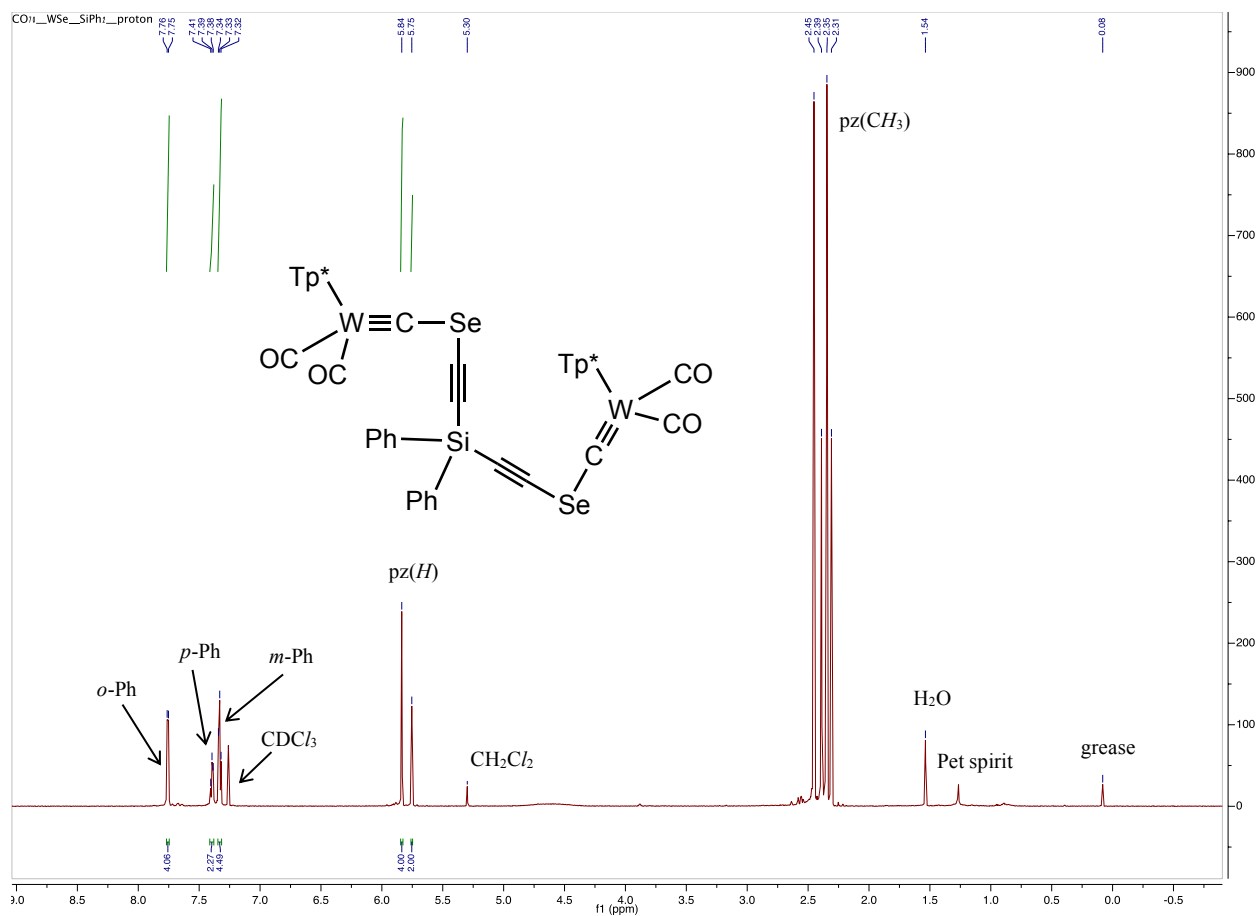

$^1\text{H NMR}$  (700 MHz,  $\text{CDCl}_3$ ,  $25^\circ\text{C}$ ,  $\delta$ ) of  $[\{(\text{Tp}^*)(\text{CO})_2\text{W}\equiv\text{CSeC}\equiv\text{C}\}_2\text{SiPh}_2]$  (**14**).



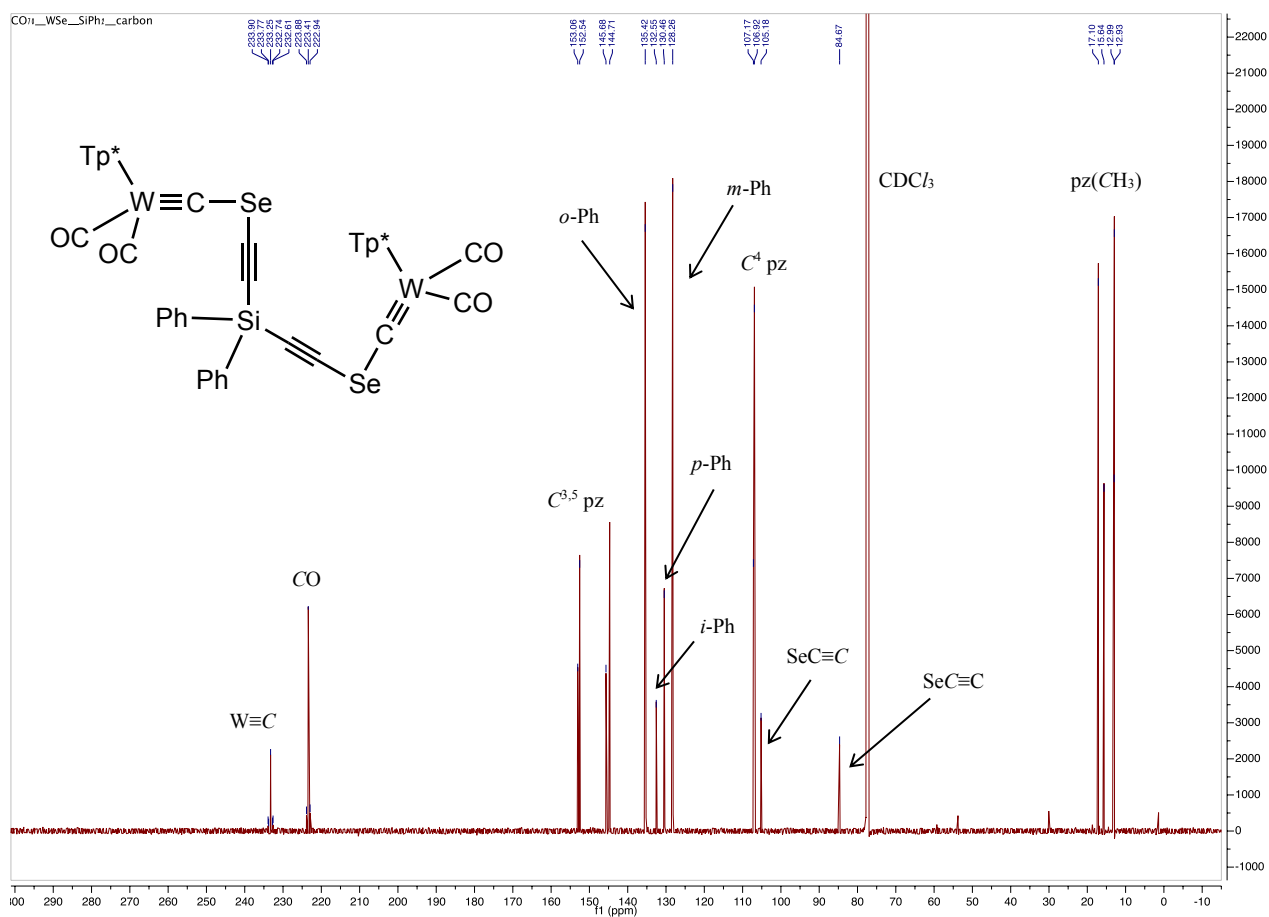

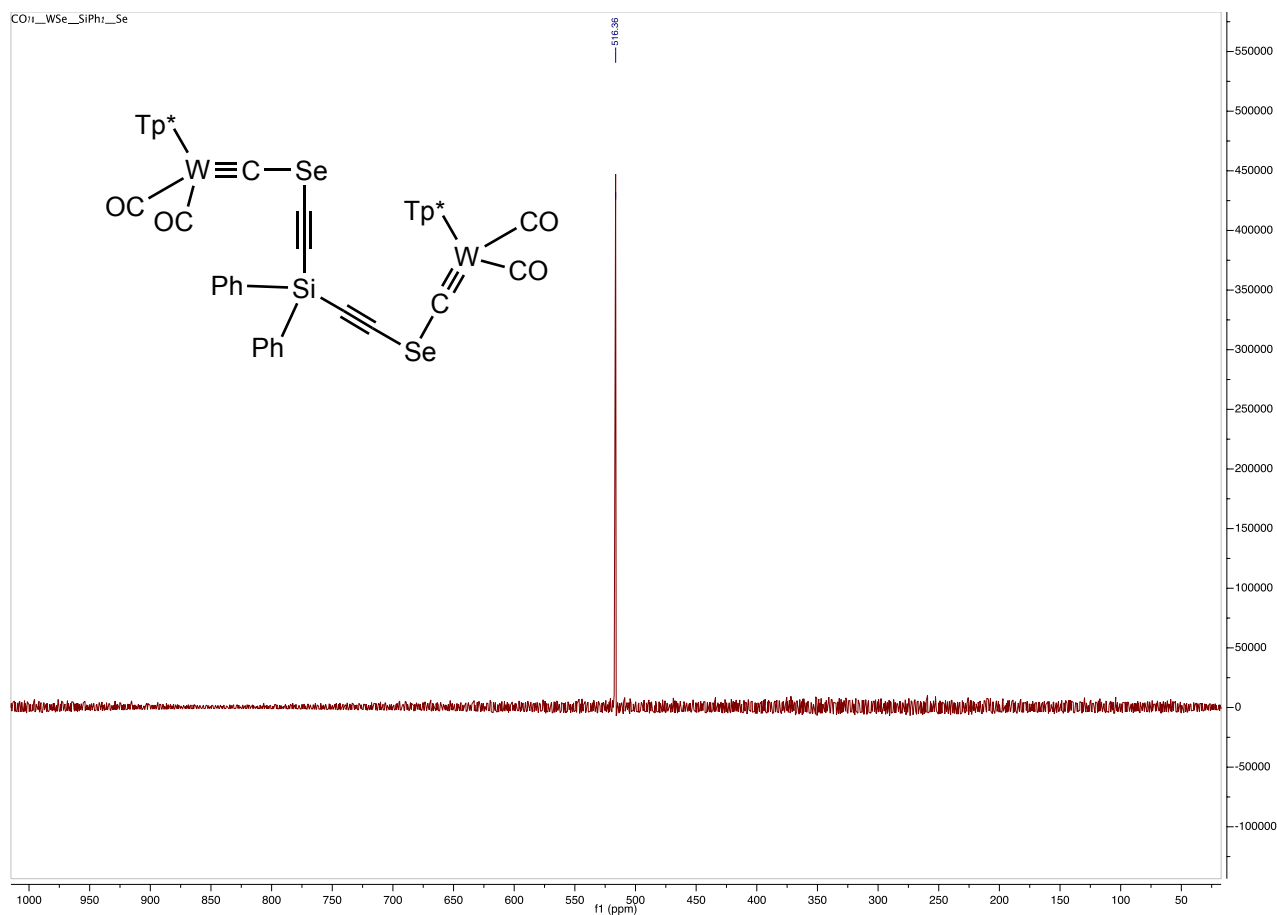

$^{77}\text{Se}\{^1\text{H}\}$  NMR (76 MHz,  $\text{CDCl}_3$ ,  $25^\circ\text{C}$ ,  $\delta$ ) of [ $\{(\text{Tp}^*)(\text{CO})_2\text{W}\equiv\text{CSeC}\equiv\text{C}\}_2\text{SiPh}_2$ ] (**14**).

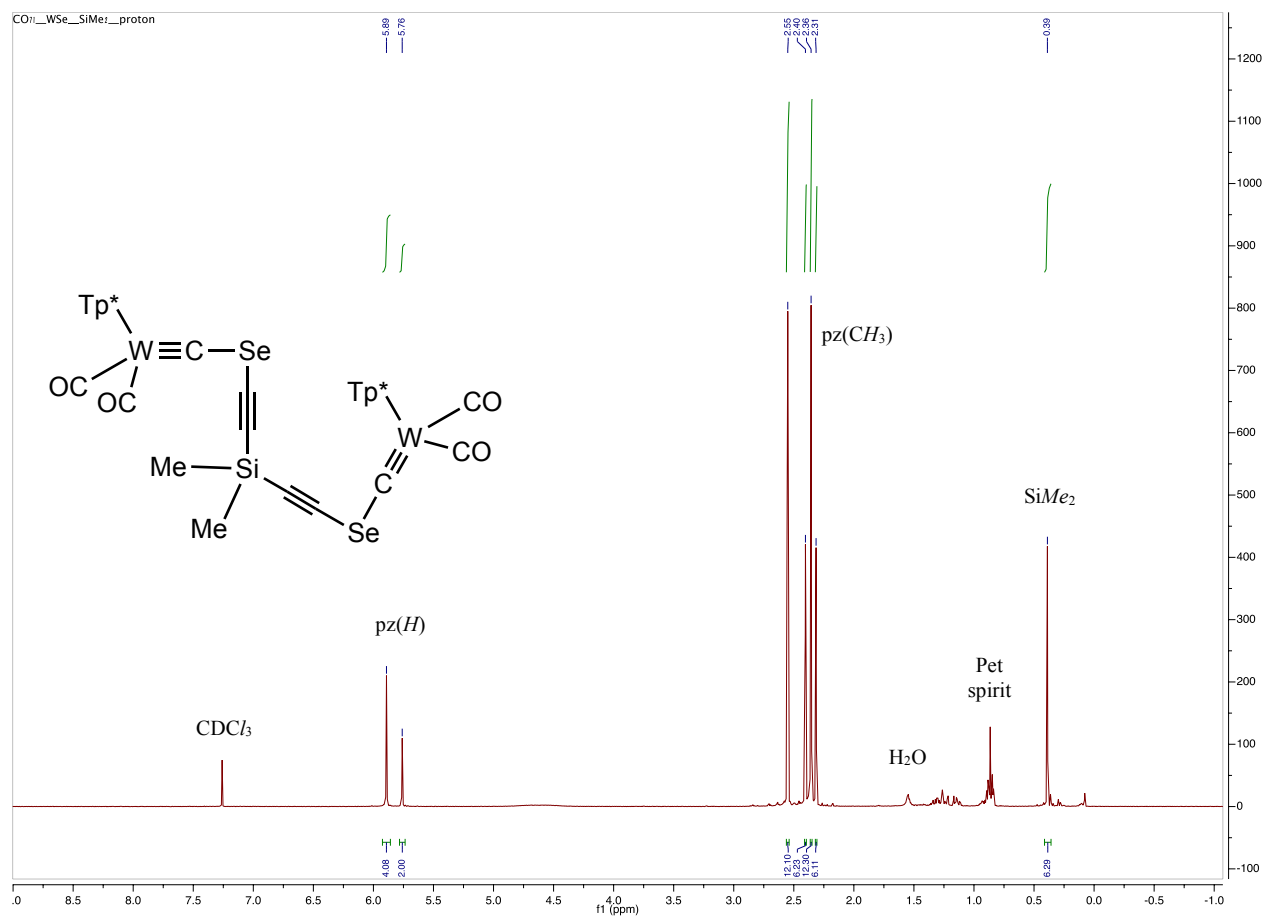

<sup>1</sup>H NMR (700 MHz, CDCl<sub>3</sub>, 25°C, δ) of [ {(Tp\*)(CO)<sub>2</sub>W≡CSeC≡C}<sub>2</sub>SiMe<sub>2</sub>] (**15**).

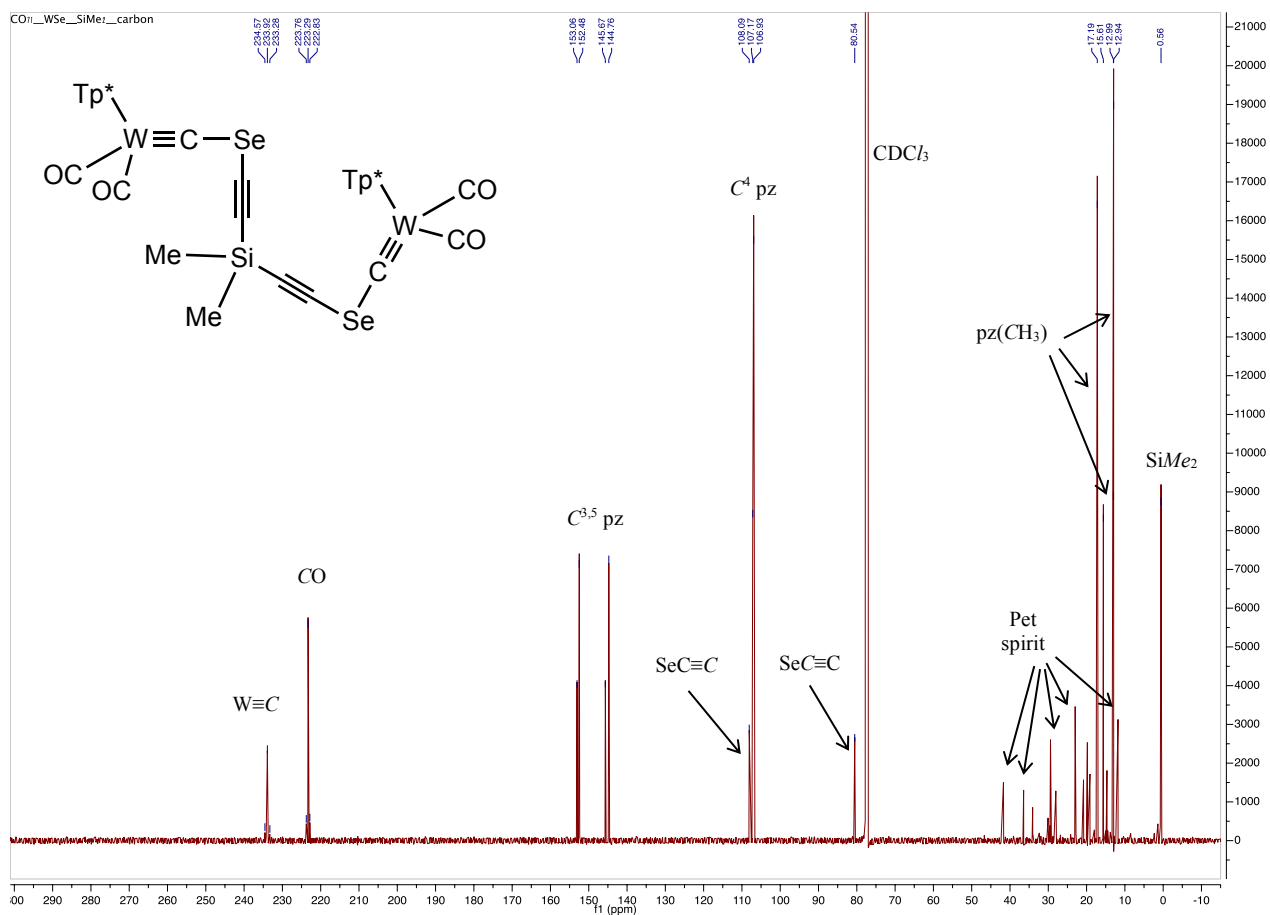

$^{13}\text{C}\{^1\text{H}\}$  NMR (176 MHz,  $\text{CDCl}_3$ ,  $25^\circ\text{C}$ ,  $\delta$ ) of  $[(\text{Tp}^*)(\text{CO})_2\text{W}=\text{C}=\text{SeC}\equiv\text{C}]_2\text{SiMe}_2$  (**15**).

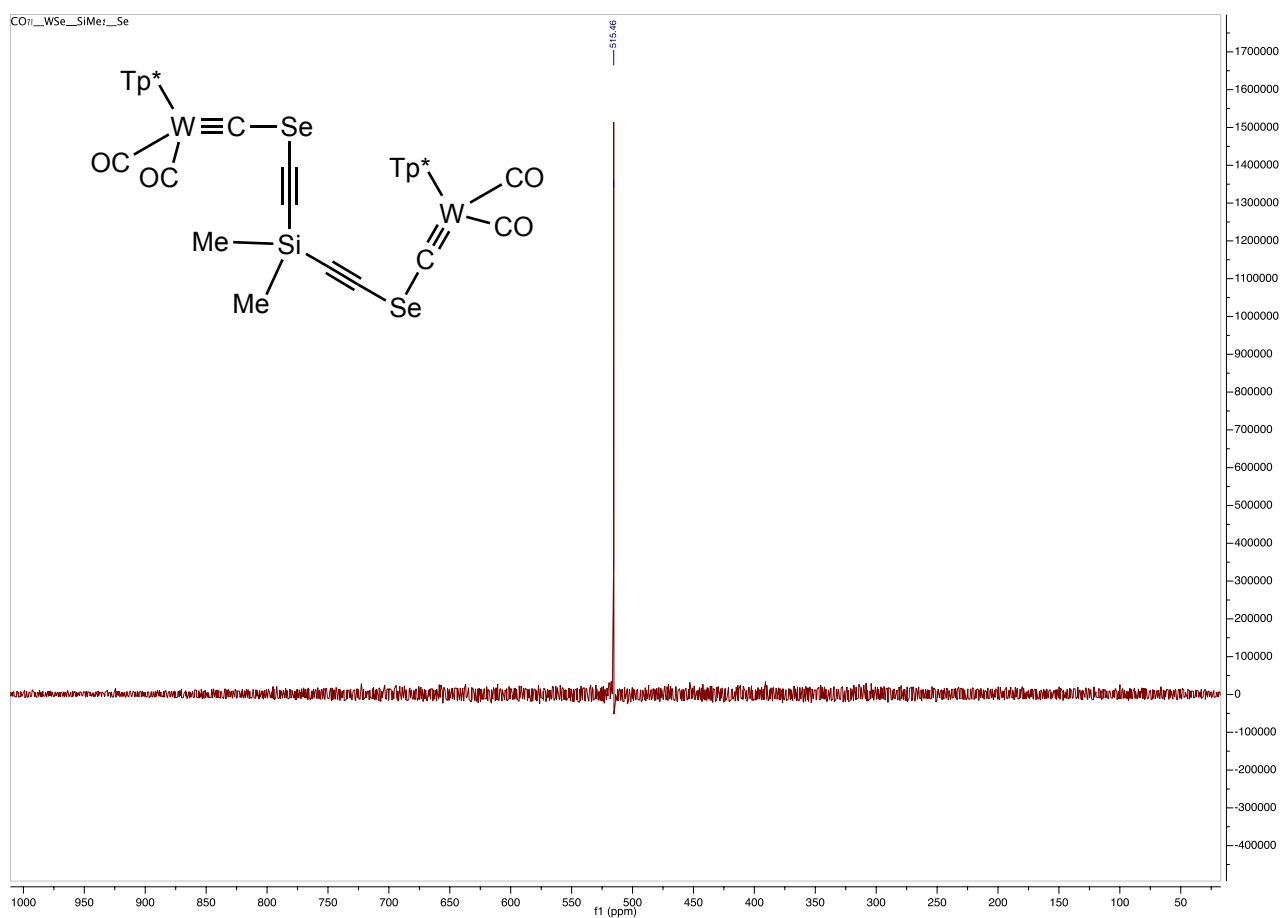

$^{77}\text{Se}\{^1\text{H}\}$  NMR (76 MHz,  $\text{CDCl}_3$ , 25 °C,  $\delta$ ) of [ $\{(\text{Tp}^*)(\text{CO})_2\text{W}\equiv\text{CSeC}\equiv\text{C}\}_2\text{SiMe}_2$ ] (**15**).

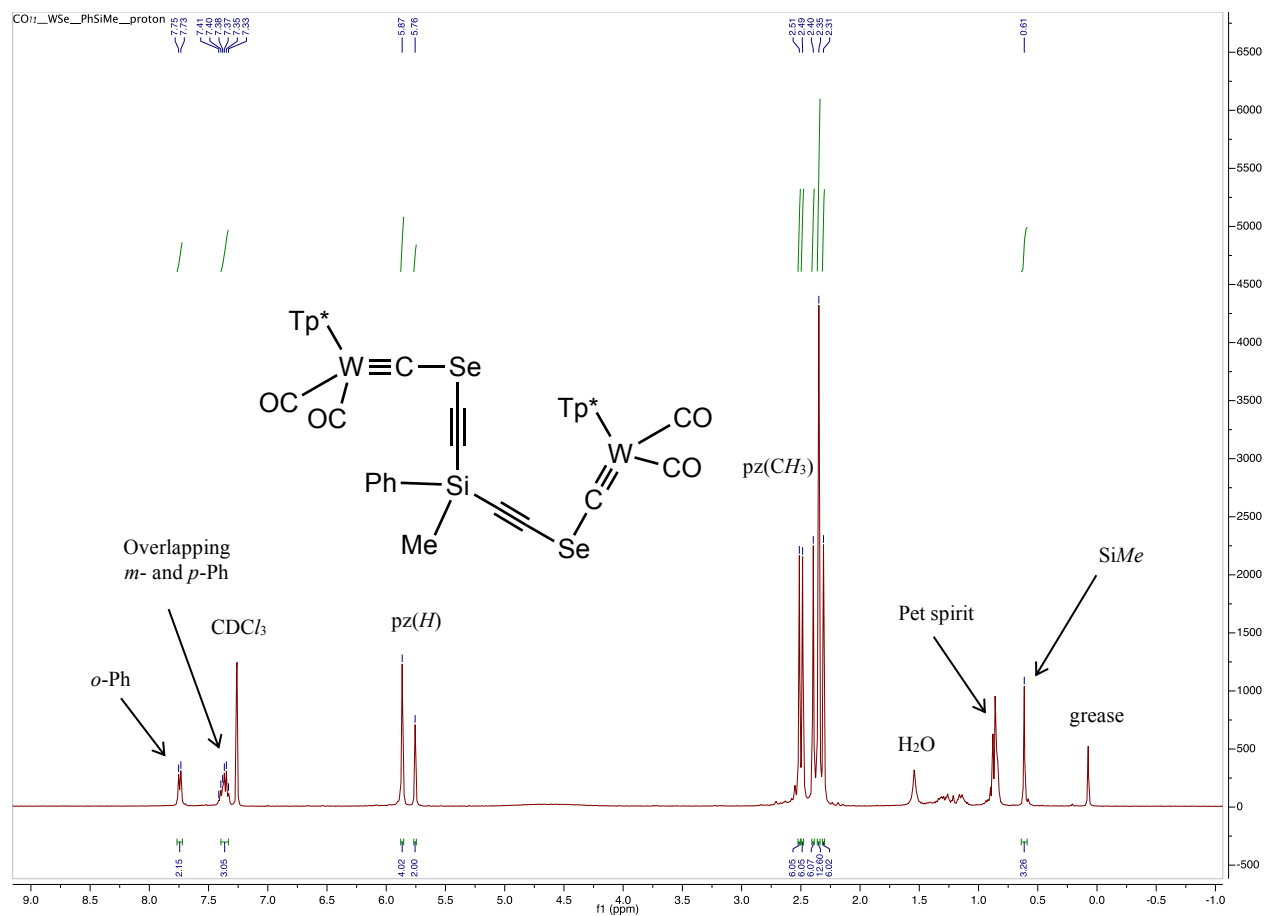

<sup>1</sup>H NMR (400 MHz, CDCl<sub>3</sub>, 25 °C, δ) of [ {(Tp\*)(CO)<sub>2</sub>W≡CSeC≡C}<sub>2</sub>SiPhMe ] (**16**).



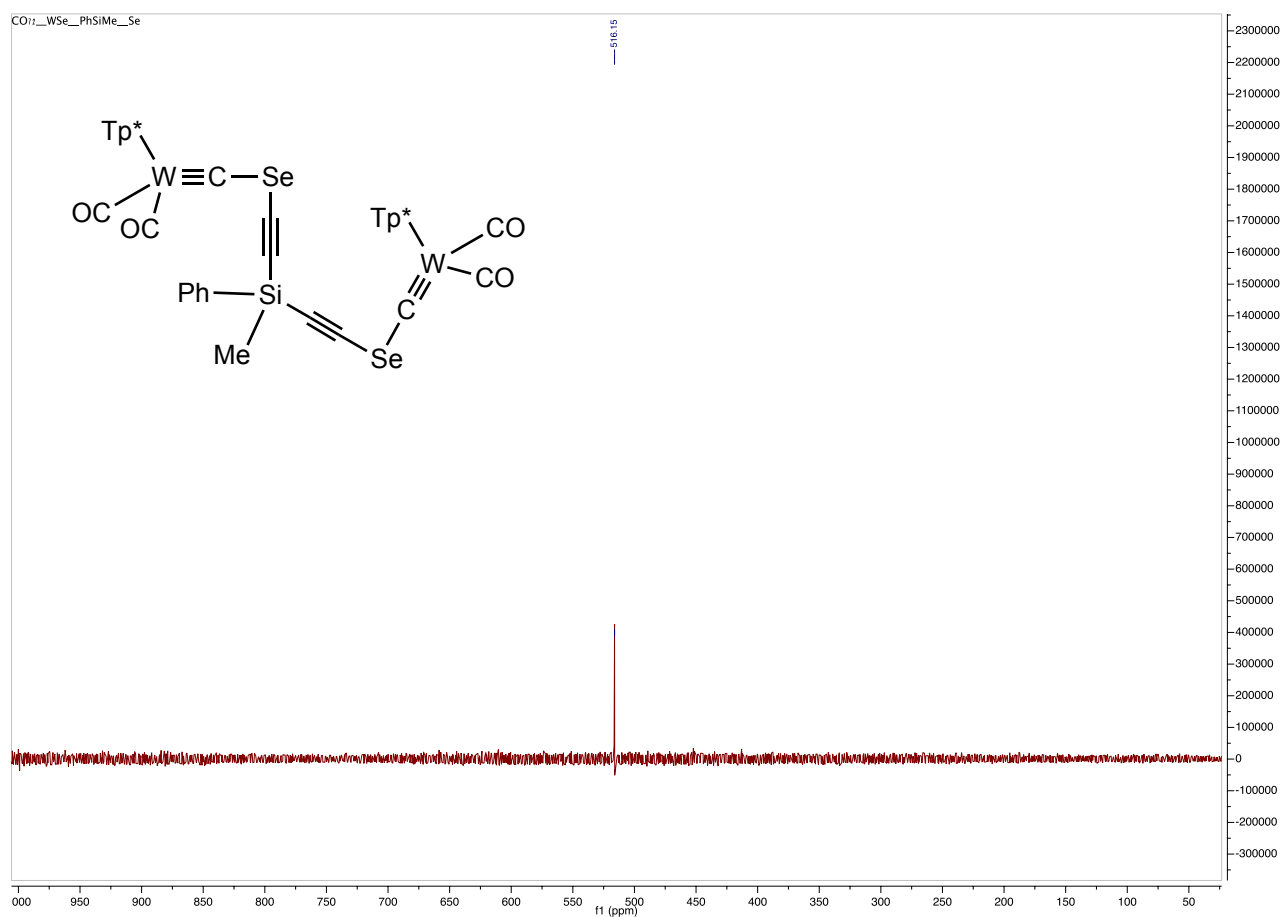

$^{77}\text{Se}\{^1\text{H}\}$  NMR (76 MHz,  $\text{CDCl}_3$ , 25 °C,  $\delta$ ) of [ $\{(\text{Tp}^*)(\text{CO})_2\text{W}\equiv\text{CSeC}\equiv\text{C}\}_2\text{SiPhMe}$ ] (**16**).



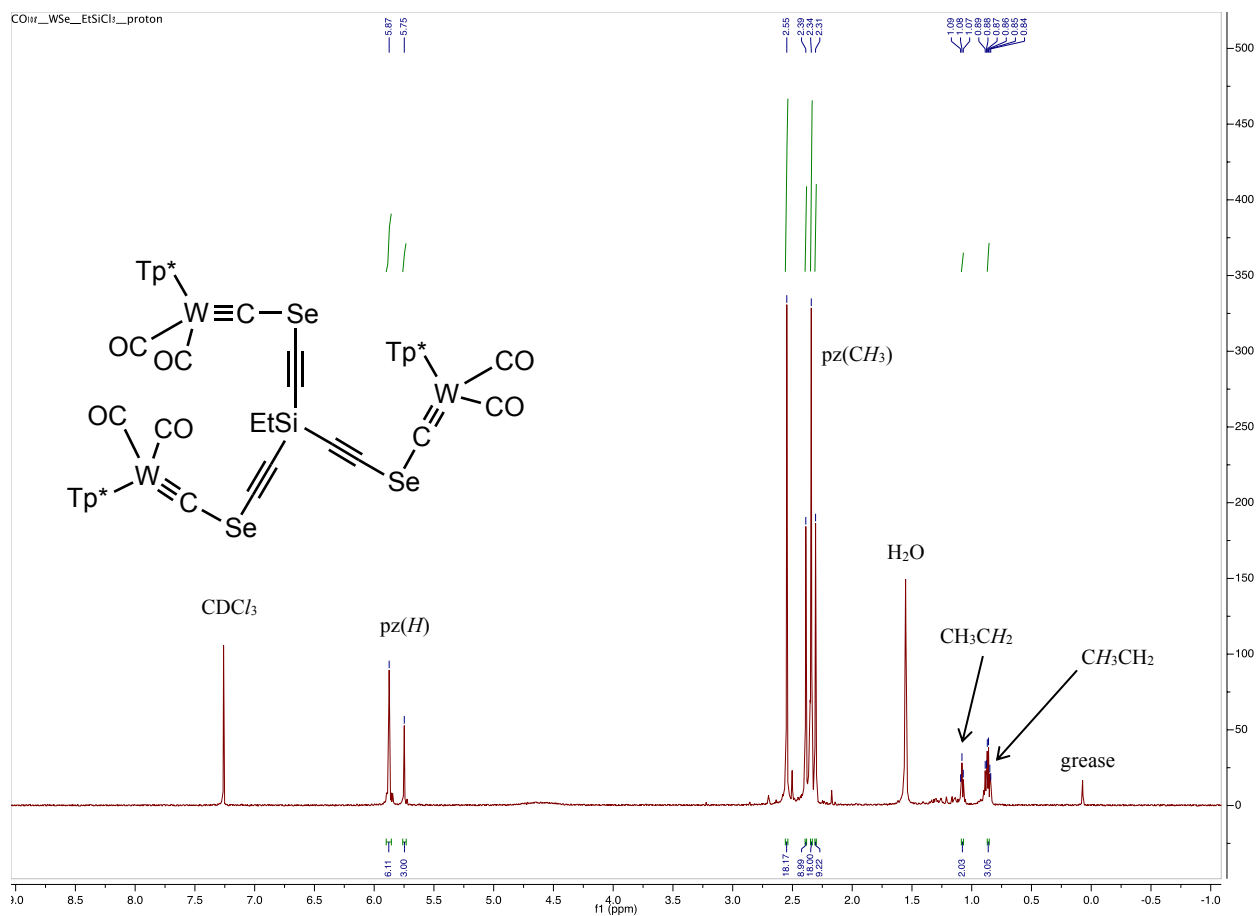

$^1\text{H NMR}$  (700 MHz,  $\text{CDCl}_3$ ,  $25^\circ\text{C}$ ,  $\delta$ ) of  $[(\text{Tp}^*)(\text{CO})_2\text{W}\equiv\text{CSe}\equiv\text{C}\{\text{SiEt}\}_3]_3$  (**17**).

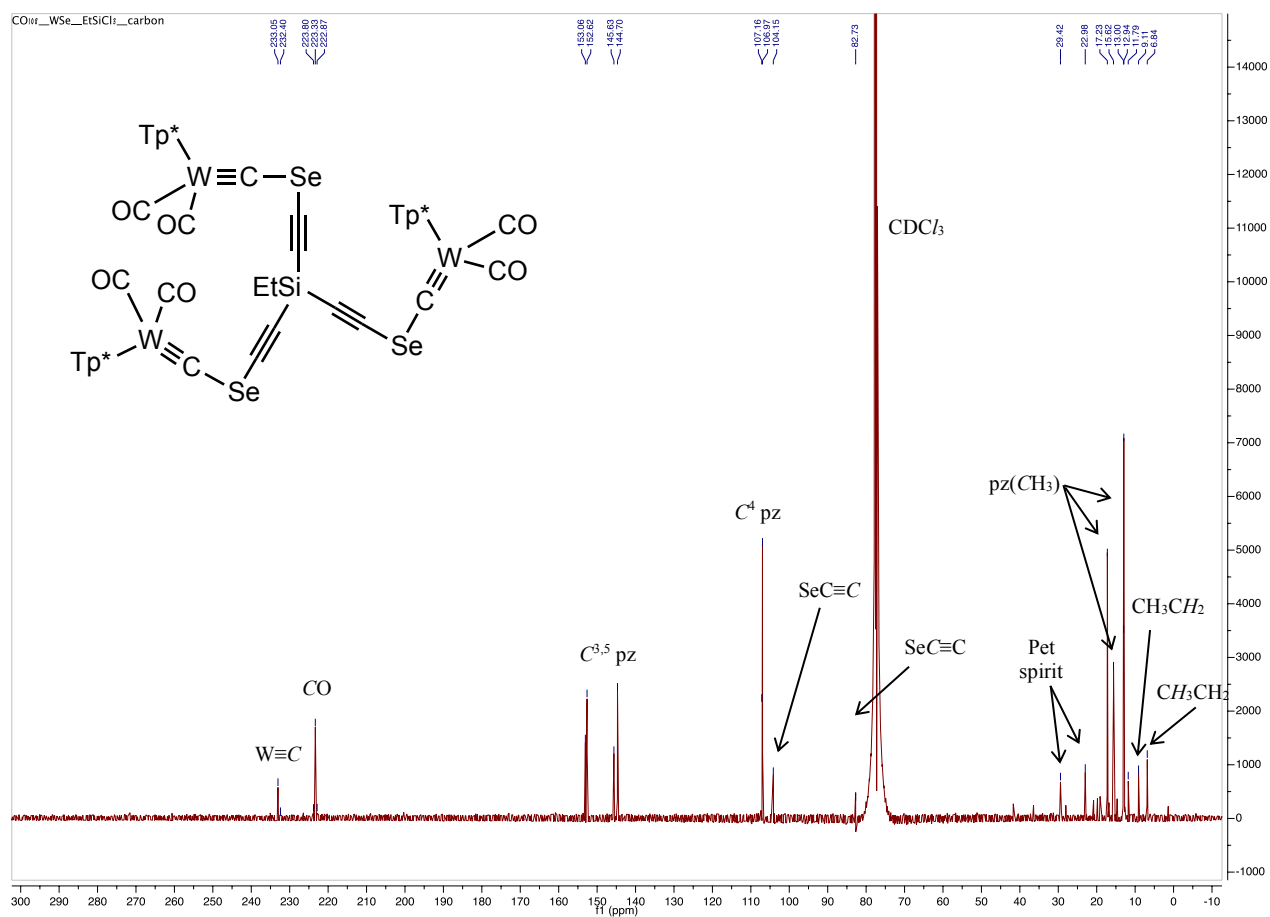

$^{13}\text{C}\{^1\text{H}\}$  NMR (176 MHz, CDCl<sub>3</sub>, 25°C,  $\delta$ ) of [ $\{(\text{Tp}^*)(\text{CO})_2\text{W}\equiv\text{CSeC}\equiv\text{C}\}_3\text{SiEt}$ ] (**17**).

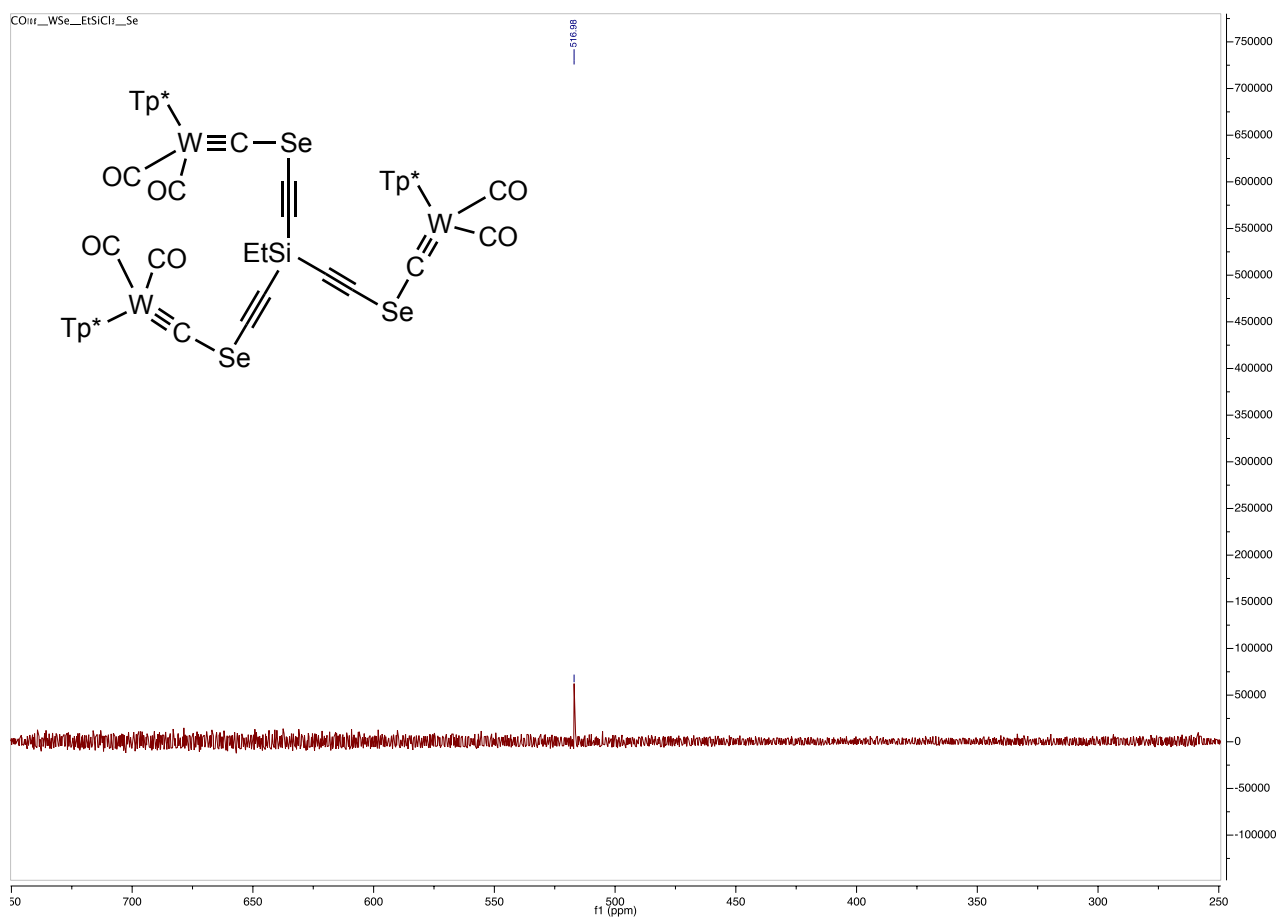

$^{77}\text{Se}\{^1\text{H}\}$  NMR (76 MHz,  $\text{CDCl}_3$ ,  $25^\circ\text{C}$ ,  $\delta$ ) of  $[\{(\text{Tp}^*)(\text{CO})_2\text{W}=\text{CSeC}\equiv\text{C}\}_3\text{SiEt}]$  (**17**).

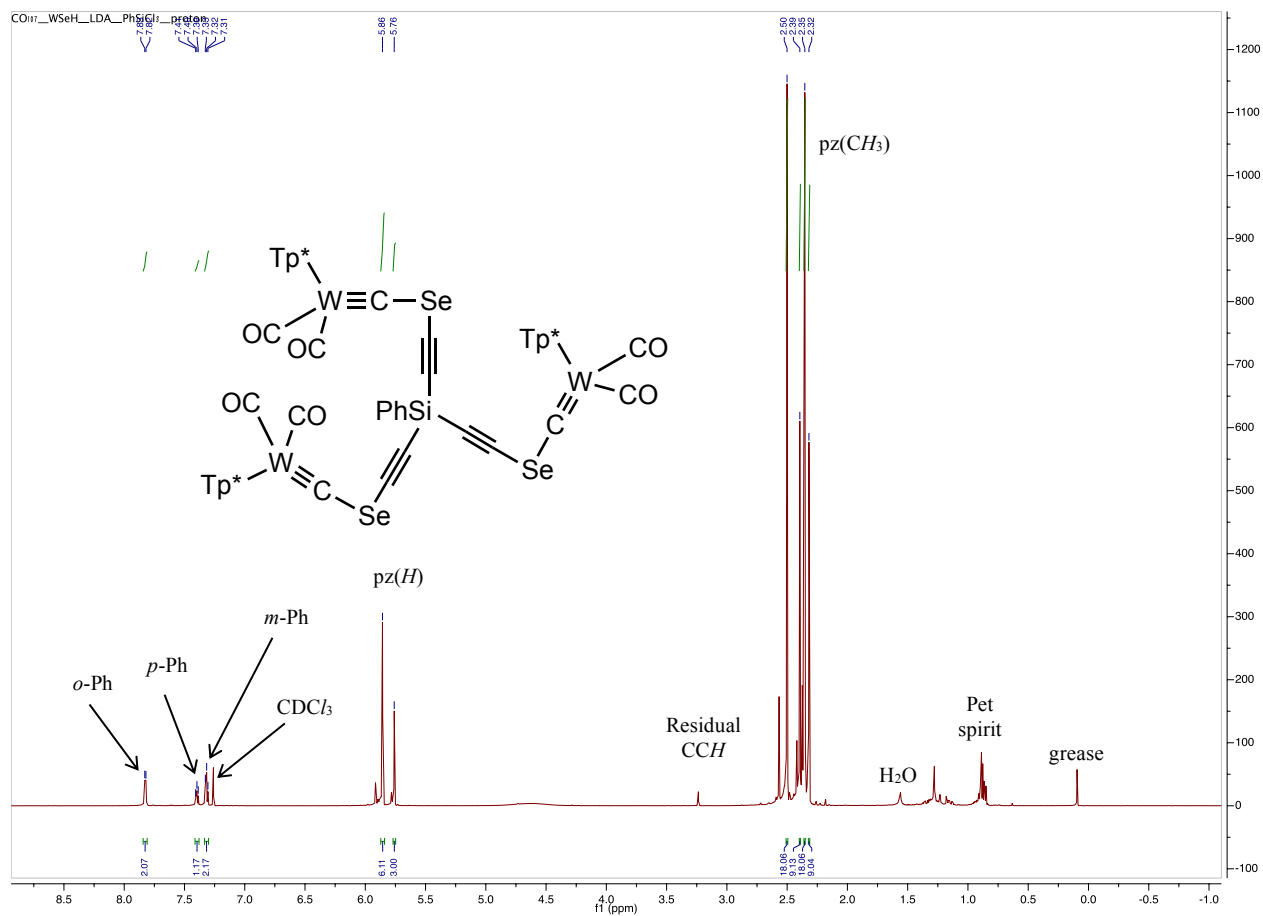

$^1\text{H}$  NMR (400 MHz,  $\text{CDCl}_3$ ,  $25^\circ\text{C}$ ,  $\delta$ ) of  $[\{(\text{Tp}^*)(\text{CO})_2\text{W}\equiv\text{CSe}\equiv\text{C}\}_3\text{SiPh}]$  (**18**).

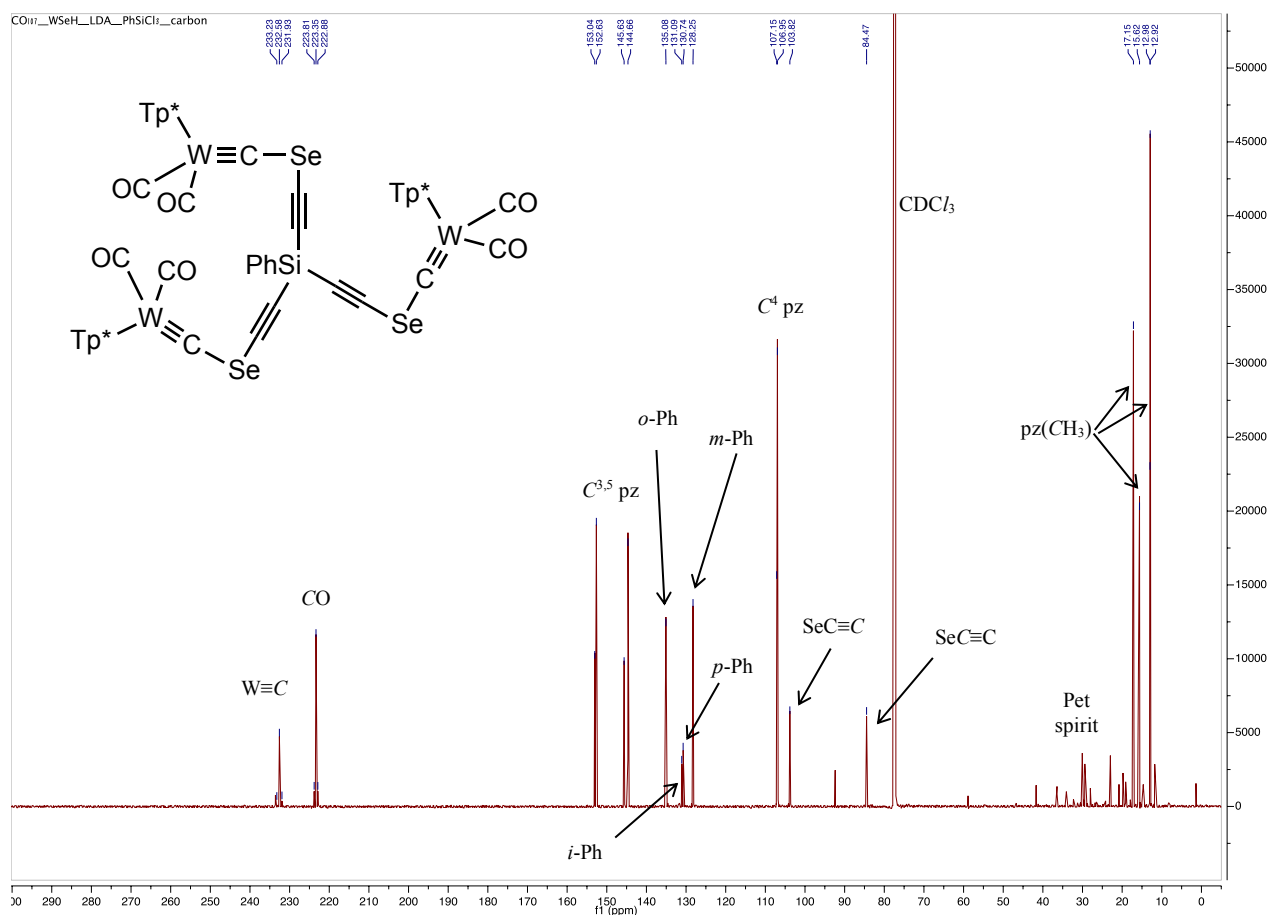

$^{13}\text{C}\{^1\text{H}\}$  NMR (101 MHz,  $\text{CDCl}_3$ , 25°C,  $\delta$ ) of  $[(\text{Tp}^*)(\text{CO})_2\text{W}\equiv\text{CSe}\equiv\text{C}]_3\text{SiPh}$  (**18**).

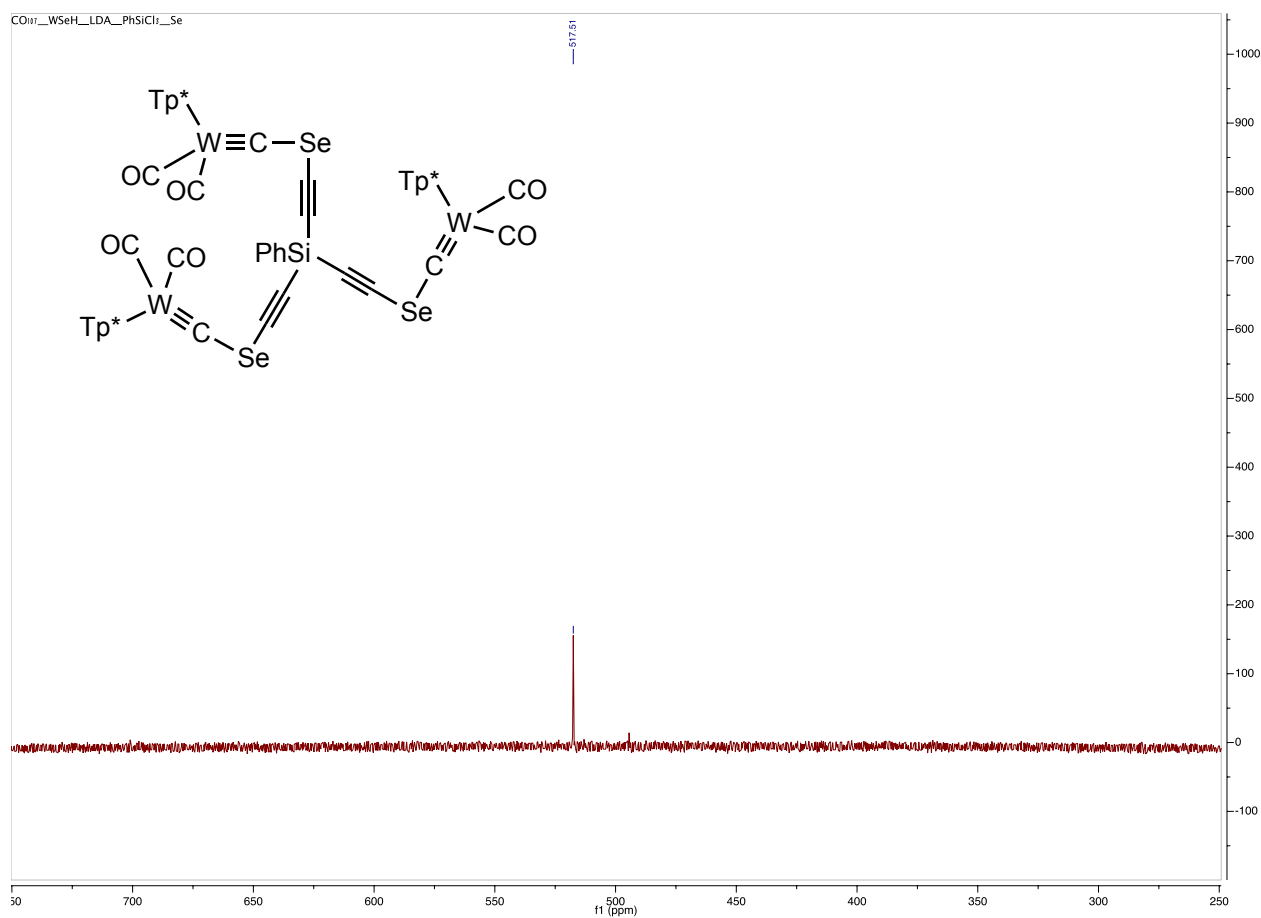

$^{77}\text{Se}\{^1\text{H}\}$  NMR (76 MHz,  $\text{CDCl}_3$ ,  $25^\circ\text{C}$ ,  $\delta$ ) of [ $\{(\text{Tp}^*)(\text{CO})_2\text{W}=\text{CSeC}\equiv\text{C}\}_3\text{SiPh}$ ] (**18**).

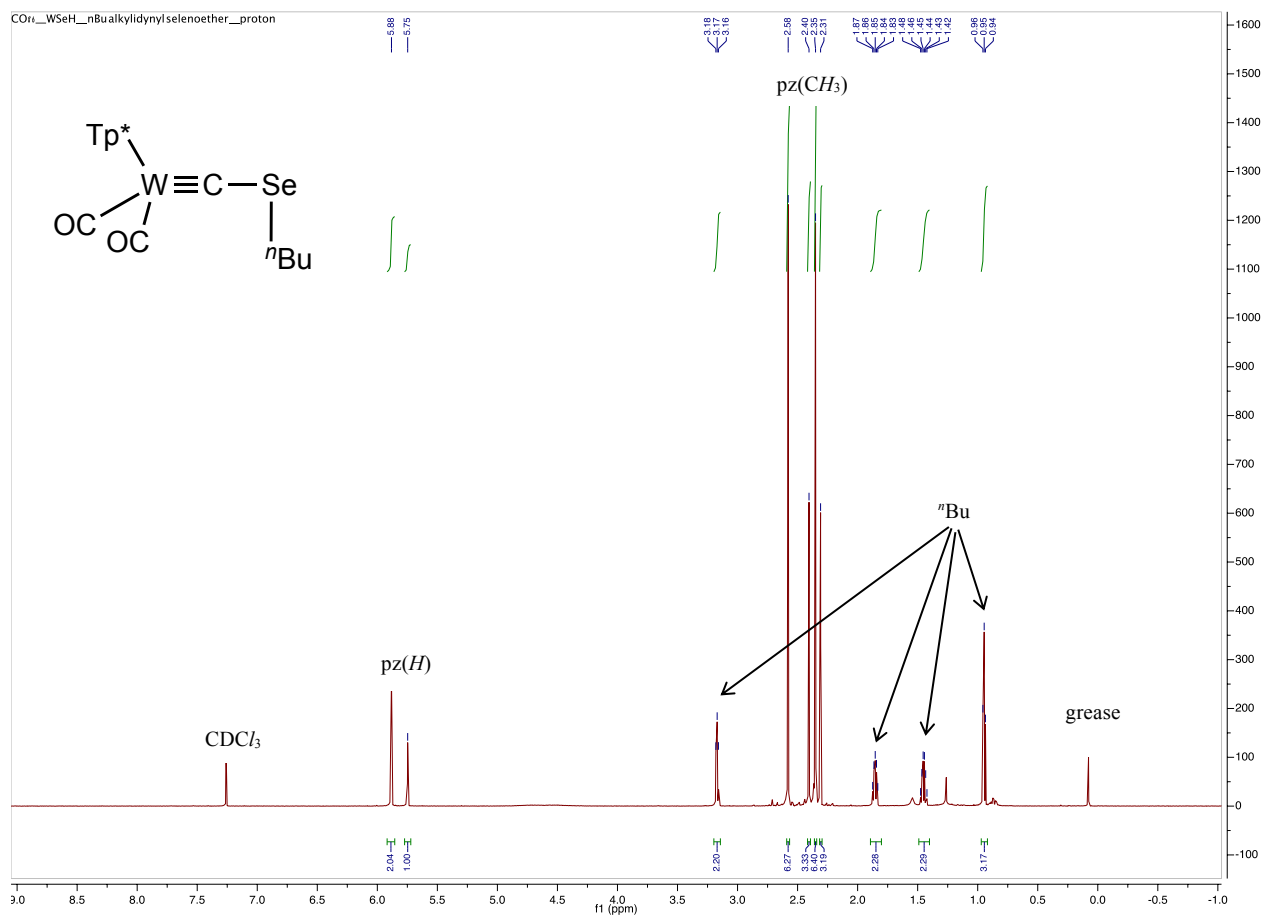

$^1H$  NMR (700 MHz,  $CDCl_3$ , 25 °C,  $\delta$ ) of  $[W(=CSe^nBu)(CO)_2(Tp^*)]$  (19).

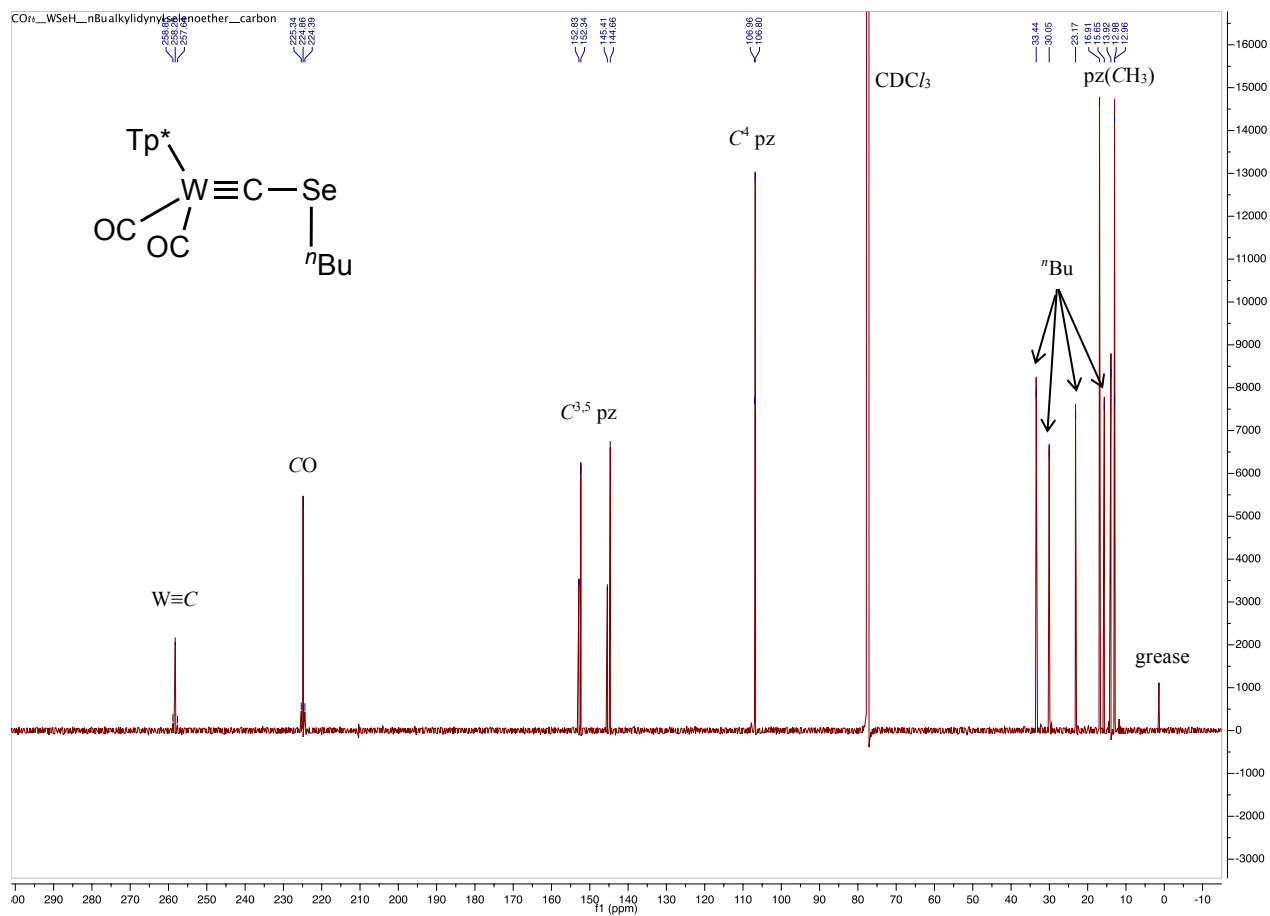

$^{13}\text{C}\{^1\text{H}\}$  NMR (176 MHz,  $\text{CDCl}_3$ , 25°C,  $\delta$ ) of  $[\text{W}(\equiv\text{CSe}^n\text{Bu})(\text{CO})_2(\text{Tp}^*)]$  (19).



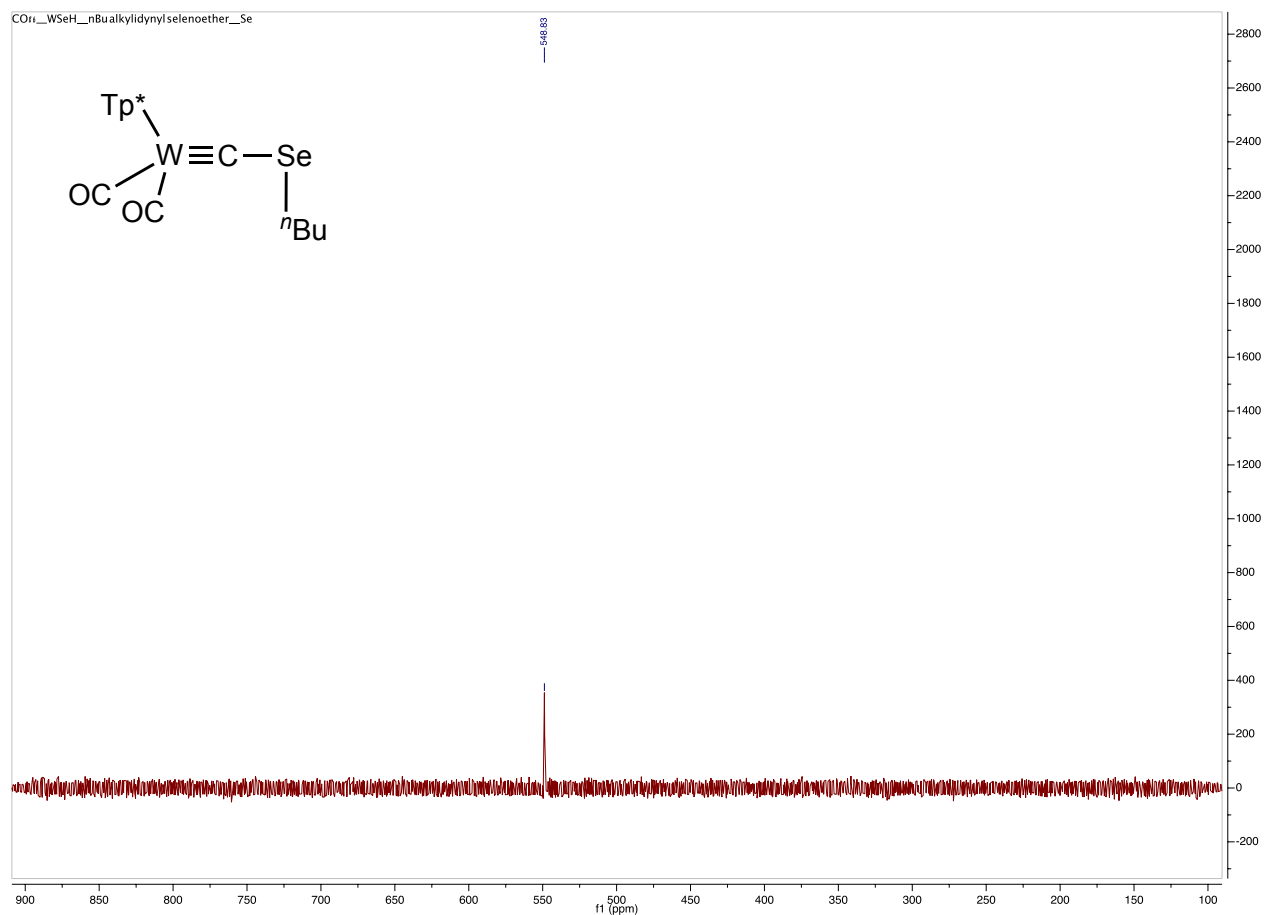

$^{77}\text{Se}\{^1\text{H}\}$  NMR (76 MHz,  $\text{CDCl}_3$ ,  $25^\circ\text{C}$ ,  $\delta$ ) of  $[\text{W}(\equiv\text{CSe}^n\text{Bu})(\text{CO})_2(\text{Tp}^*)]$  (19).
